# Supplementary material
Source: PubMed Central journal article supplement (PMC4915992)
Supplement: NIHMS767925-supplement-Supplemental_Digital_Content_1-19_combined.pdf [file NIHMS767925-supplement-Supplemental_Digital_Content_1-19_combined.pdf]

Nomen: \_\_\_\_\_

Datum: \_\_\_\_\_

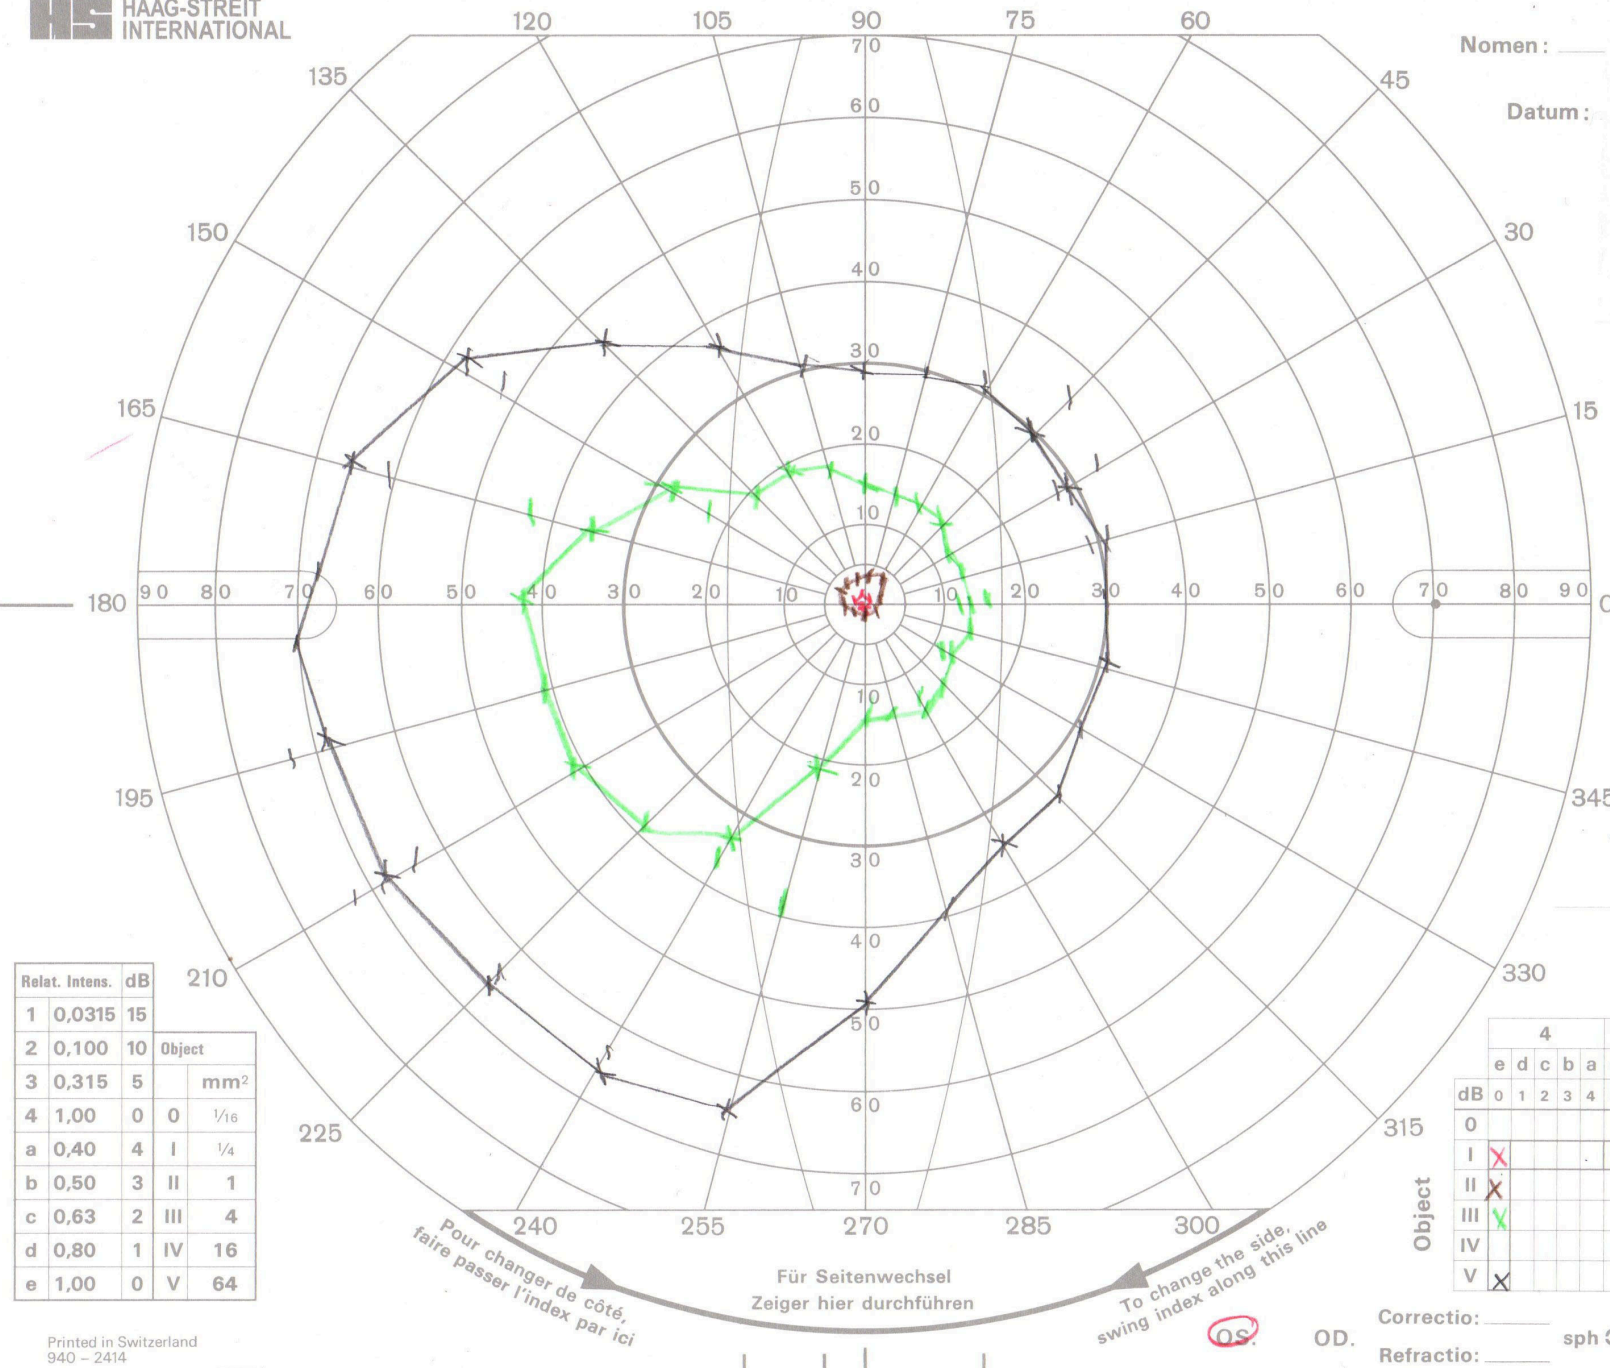

| Relat. Intens. | dB     | Object |                 |
|----------------|--------|--------|-----------------|
| 1              | 0,0315 | 15     |                 |
| 2              | 0,100  | 10     |                 |
| 3              | 0,315  | 5      |                 |
| 4              | 1,00   | 0      | mm <sup>2</sup> |
| a              | 0,40   | 4      | I 1/4           |
| b              | 0,50   | 3      | II 1            |
| c              | 0,63   | 2      | III 4           |
| d              | 0,80   | 1      | IV 16           |
| e              | 1,00   | 0      | V 64            |

| Object | 4 |   |   |   |   |
|--------|---|---|---|---|---|
|        | e | d | c | b | a |
| dB     | 0 | 1 | 2 | 3 | 4 |
| 0      |   |   |   |   |   |
| I      | X |   |   |   |   |
| II     | X |   |   |   |   |
| III    | X |   |   |   |   |
| IV     |   |   |   |   |   |
| V      | X |   |   |   |   |

Pour changer de côté,  
faire passer l'index par ici

Für Seitenwechsel  
Zeiger hier durchführen

To change the side,  
swing index along this line

OS

OD.

Correctio: \_\_\_\_\_

Refractio: \_\_\_\_\_ sph

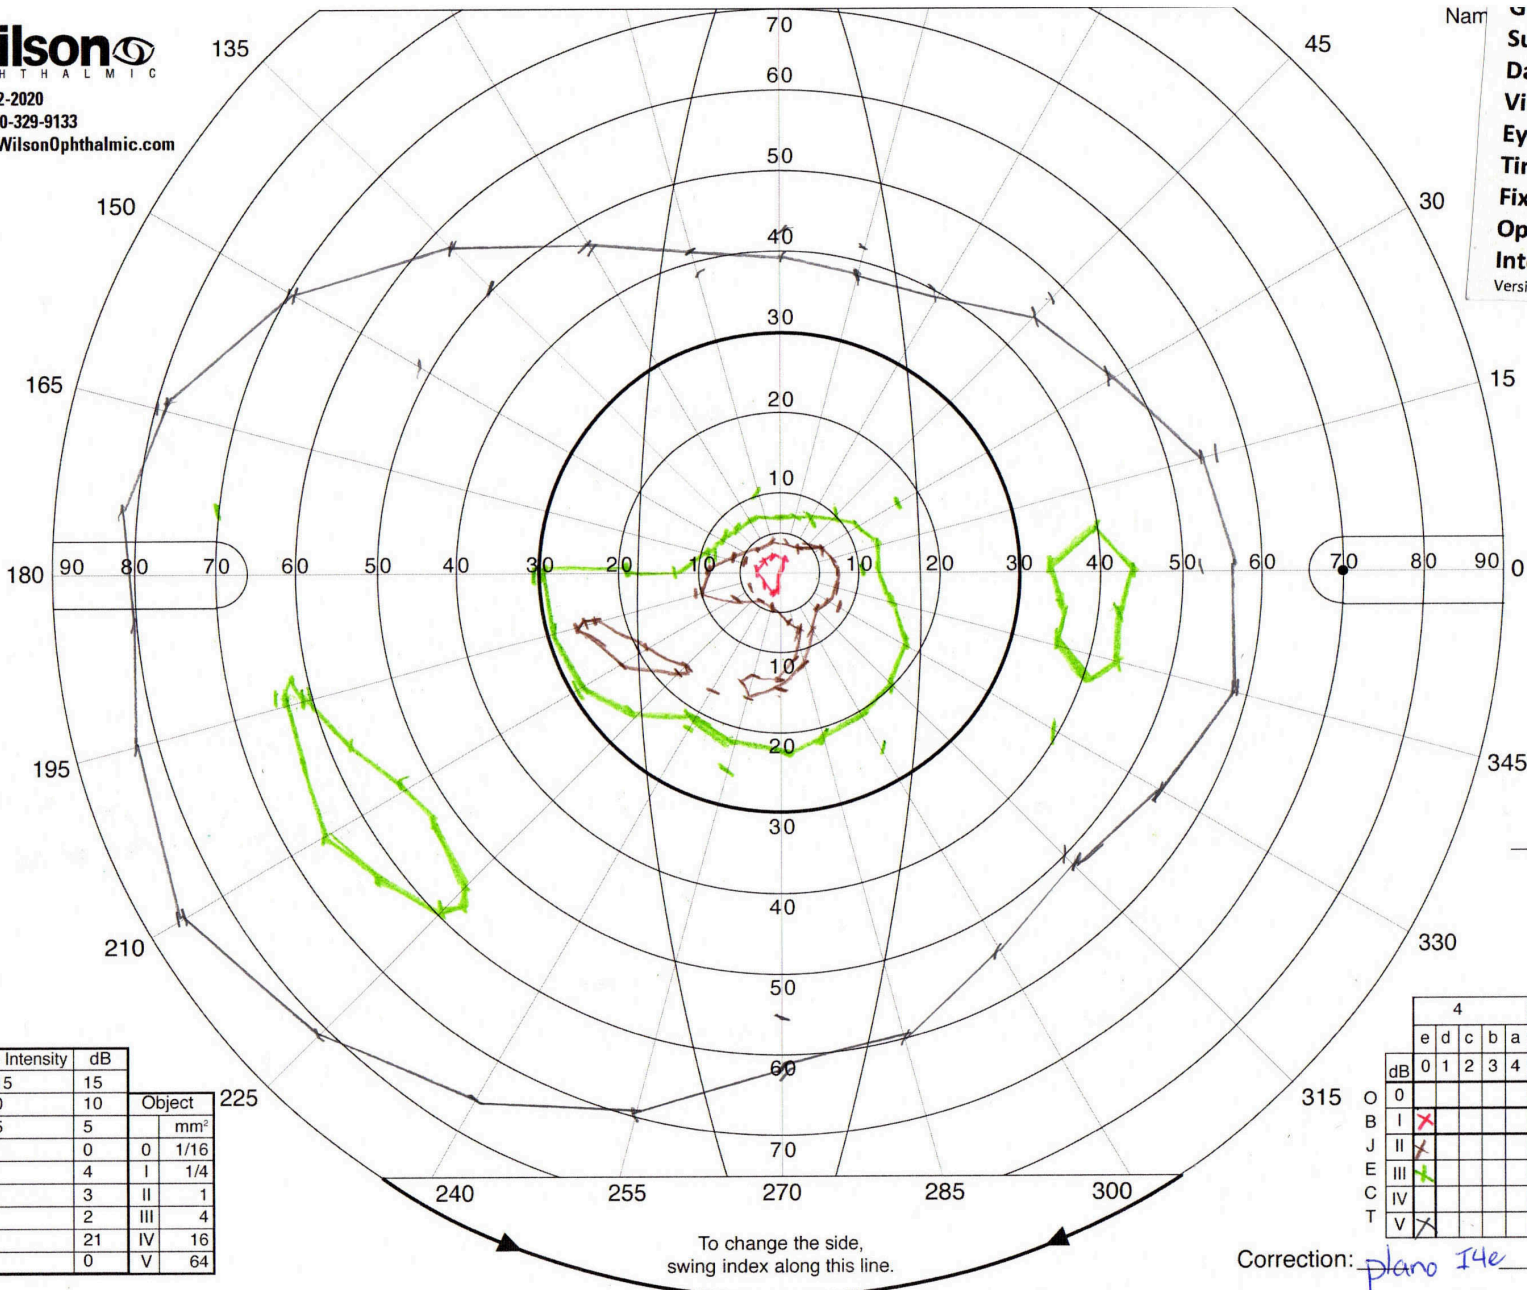

| Relative Intensity | dB     | Object | mm <sup>2</sup> |
|--------------------|--------|--------|-----------------|
| 1                  | 0.0315 | 15     |                 |
| 2                  | 0.100  | 10     |                 |
| 3                  | 0.315  | 5      |                 |
| 4                  | 1.00   | 0      | 1/16            |
| a                  | 0.40   | I      | 1/4             |
| b                  | 0.50   | II     | 1               |
| c                  | 0.63   | III    | 4               |
| d                  | 0.80   | IV     | 16              |
| e                  | 1.00   | V      | 64              |

|    | 4 |   |   |   |   |   |
|----|---|---|---|---|---|---|
| dB | 0 | 1 | 2 | 3 | 4 | 5 |
| O  |   |   |   |   |   |   |
| B  | X |   |   |   |   |   |
| J  |   |   |   |   |   |   |
| E  |   |   |   |   |   |   |
| C  |   |   |   |   |   |   |
| T  | X |   |   |   |   |   |

To change the side, swing index along this line.

Correction: plano I4e

Refraction: \_\_\_\_\_ Sph \_\_\_\_\_

Nomen: \_\_\_\_\_

Datum: \_\_\_\_\_  
 Subj: \_\_\_\_\_  
 Dat: \_\_\_\_\_  
 Visi: \_\_\_\_\_  
 Eye: \_\_\_\_\_  
 Tim: \_\_\_\_\_  
 Fixa: \_\_\_\_\_  
 Op: \_\_\_\_\_  
 Inte: \_\_\_\_\_  
 Vers: \_\_\_\_\_

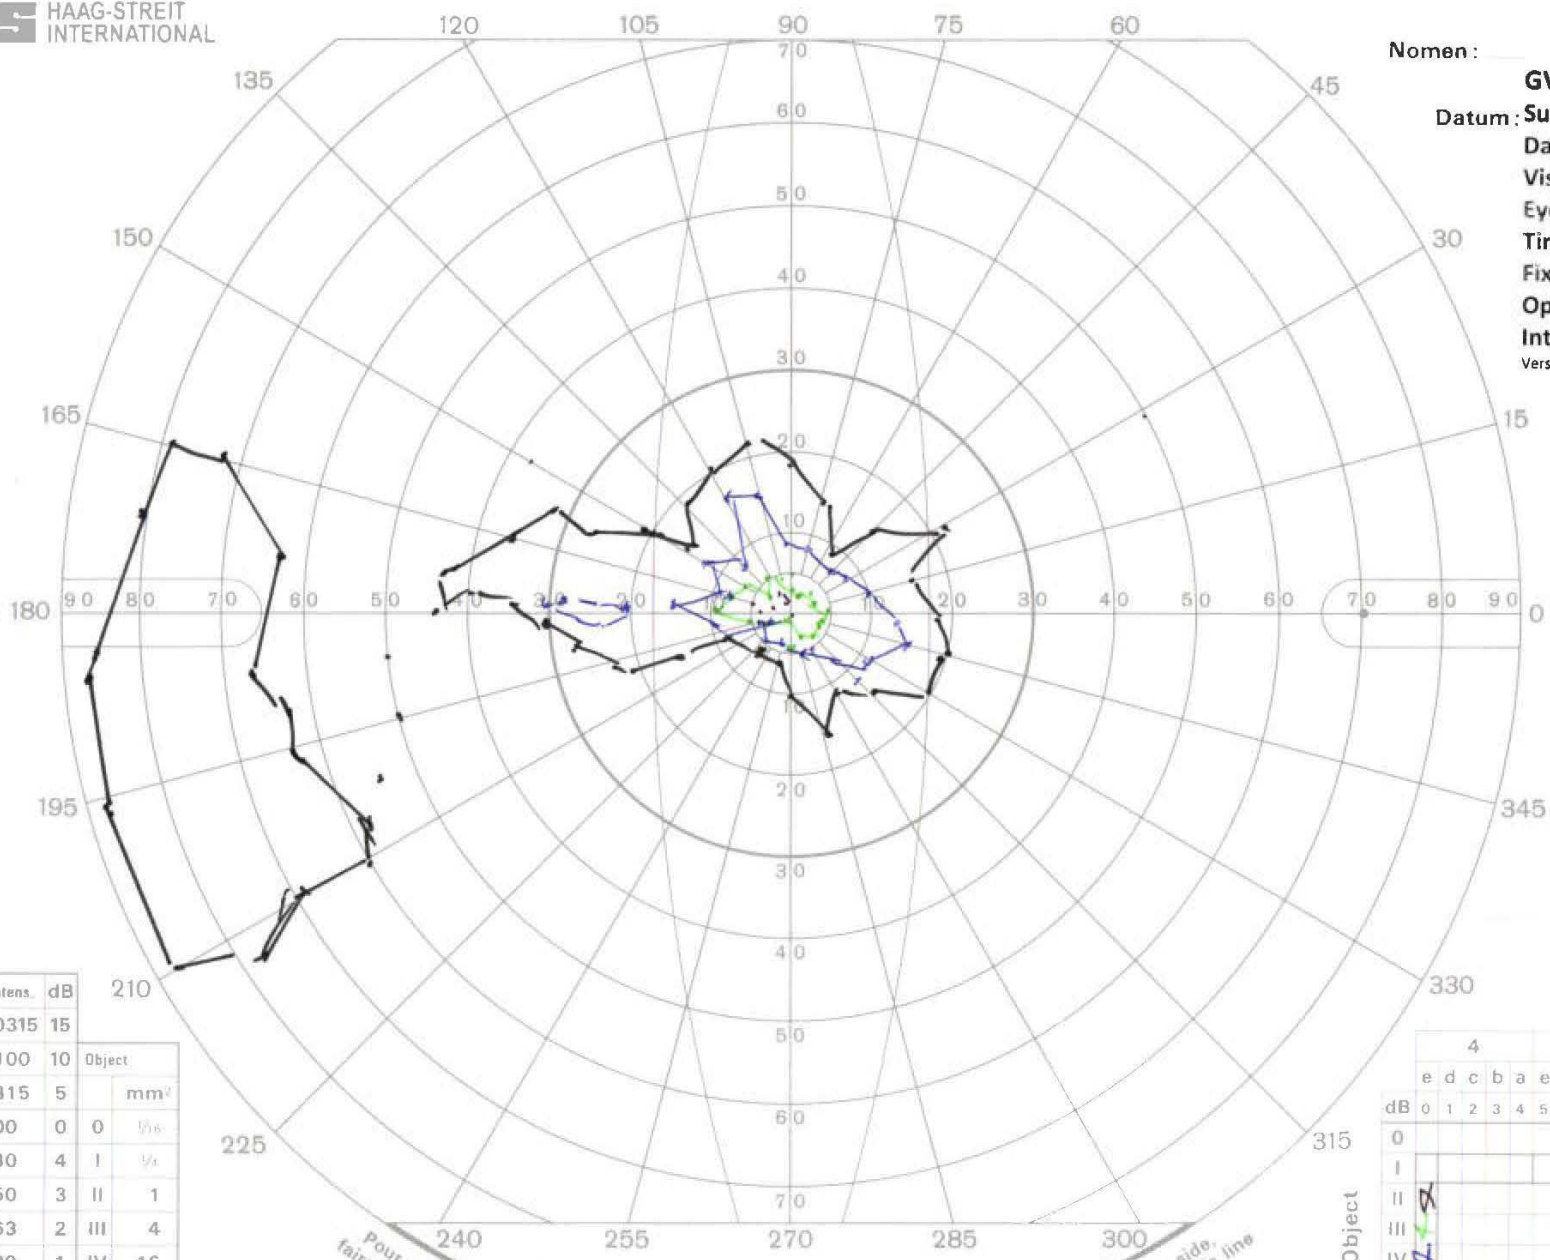

| Relat. Intens. | dB     | Object |                 |
|----------------|--------|--------|-----------------|
| 1              | 0,0315 | 15     |                 |
| 2              | 0,100  | 10     |                 |
| 3              | 0,315  | 5      | mm <sup>2</sup> |
| 4              | 1,00   | 0      | 1/8             |
| a              | 0,40   | 4      | I 1/8           |
| b              | 0,50   | 3      | II 1            |
| c              | 0,63   | 2      | III 4           |
| d              | 0,80   | 1      | IV 16           |
| e              | 1,00   | 0      | V 64            |

| dB  | Object |   |   |   |   |
|-----|--------|---|---|---|---|
|     | e      | d | c | b | a |
| 0   |        |   |   |   |   |
| I   |        |   |   |   |   |
| II  |        |   |   |   |   |
| III |        |   |   |   |   |
| IV  |        |   |   |   |   |
| V   |        |   |   |   |   |

Pour changer de côté,  
faire passer l'index par ici

Für Seitenwechsel  
Zeiger hier durchführen

To change the side,  
swing index along this line

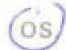

OD.

Correctio: \_\_\_\_\_

Refractio: *S-C*

sph 0

Nomen: GVF  
 Subj: Subj  
 Datum: Date  
 Visit: Visit  
 Eye: Eye  
 Time: Time  
 Fixat: Fixat  
 Oper: Oper  
 Inter: Inter  
 version: version

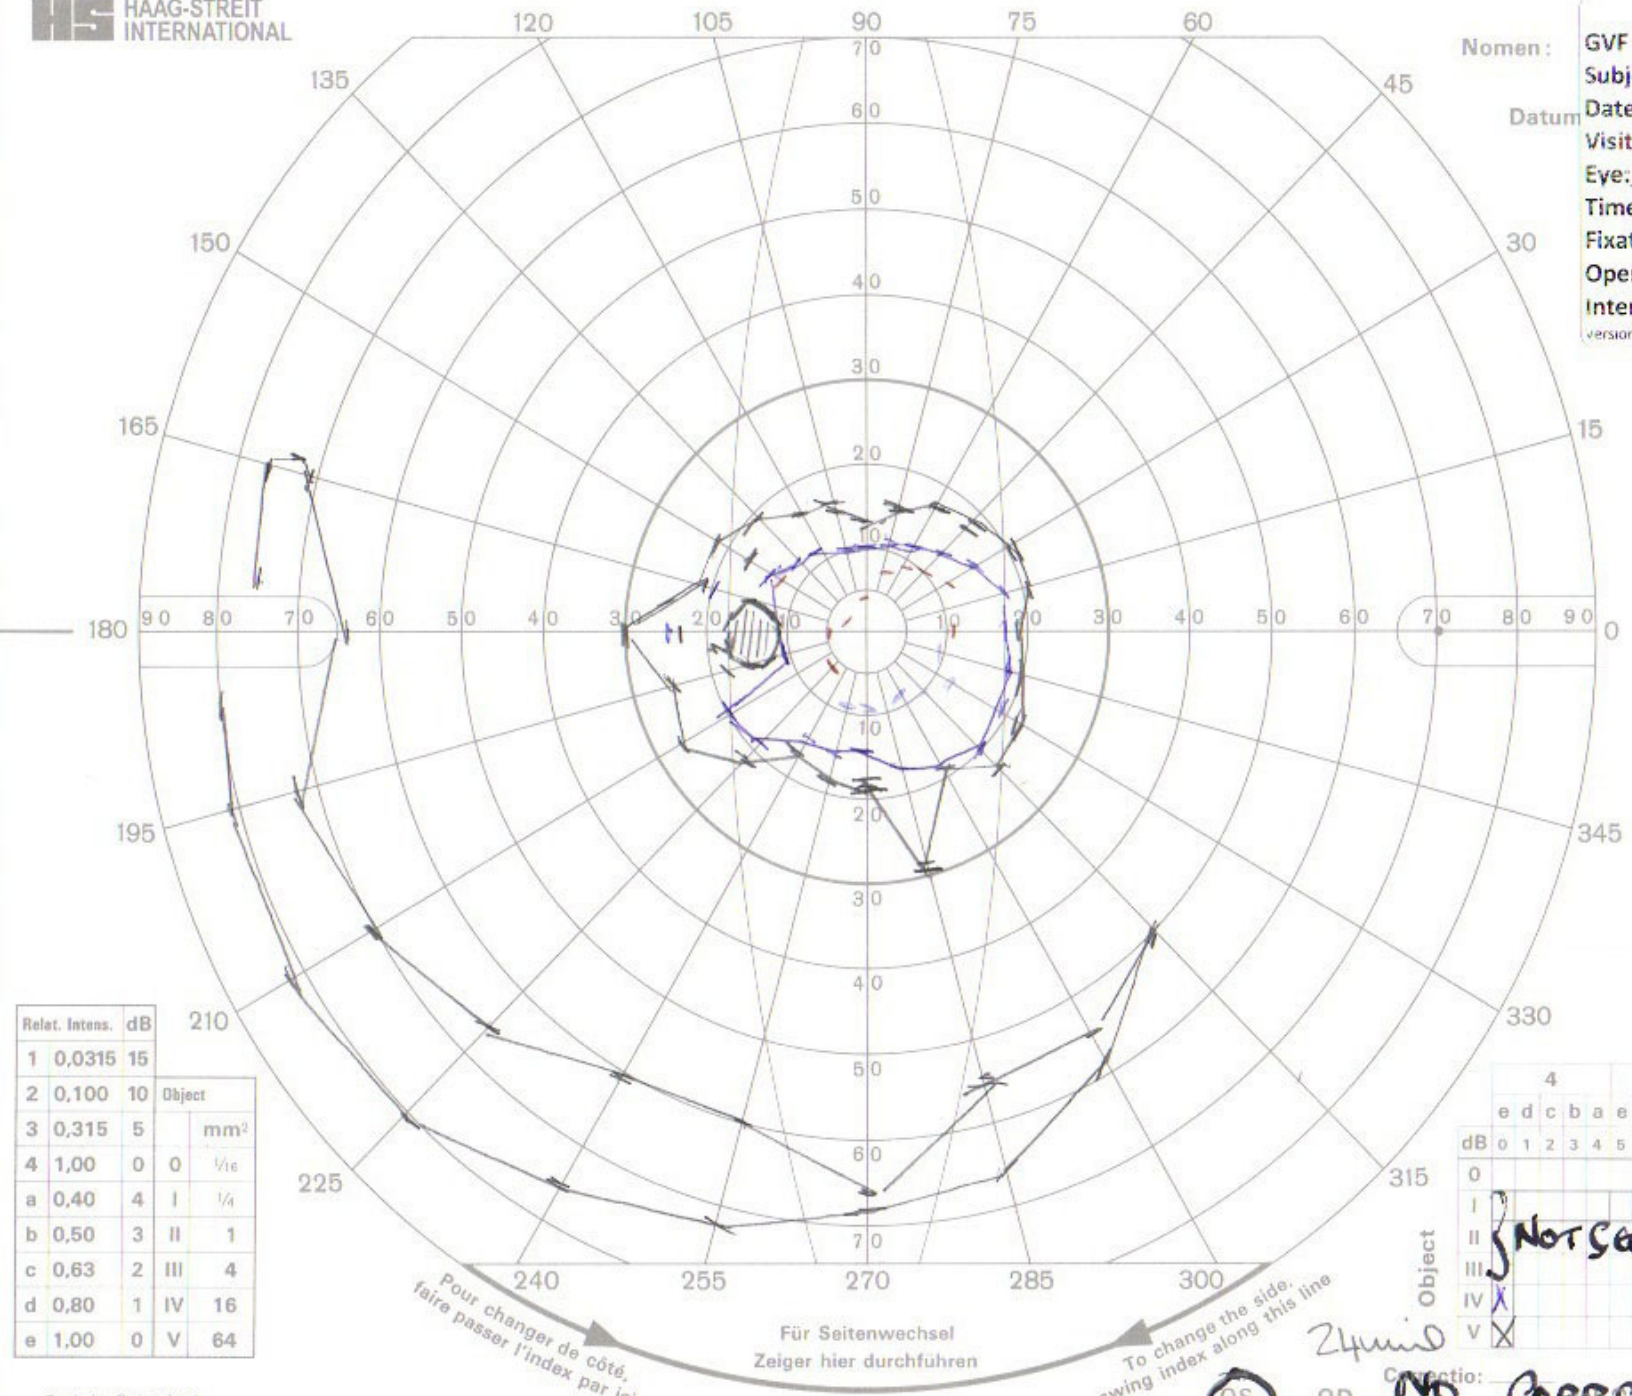

| Relat. Intens. | dB     | Object |
|----------------|--------|--------|
| 1              | 0,0315 | 15     |
| 2              | 0,100  | 10     |
| 3              | 0,315  | 5      |
| 4              | 1,00   | 0      |
| a              | 0,40   | 4      |
| b              | 0,50   | 3      |
| c              | 0,63   | 2      |
| d              | 0,80   | 1      |
| e              | 1,00   | 0      |

  

| Object | mm <sup>2</sup> |
|--------|-----------------|
| 0      | 1/16            |
| I      | 1/4             |
| II     | 1               |
| III    | 4               |
| IV     | 16              |
| V      | 64              |

| dB  | 0 | 1 | 2 | 3 | 4 | 5 |
|-----|---|---|---|---|---|---|
| 0   |   |   |   |   |   |   |
| I   |   |   |   |   |   |   |
| II  |   |   |   |   |   |   |
| III |   |   |   |   |   |   |
| IV  |   |   |   |   |   |   |
| V   |   |   |   |   |   |   |

OS. OD. Refractive: NO CORRE

Nomen: \_\_\_\_\_

Datum: \_\_\_\_\_

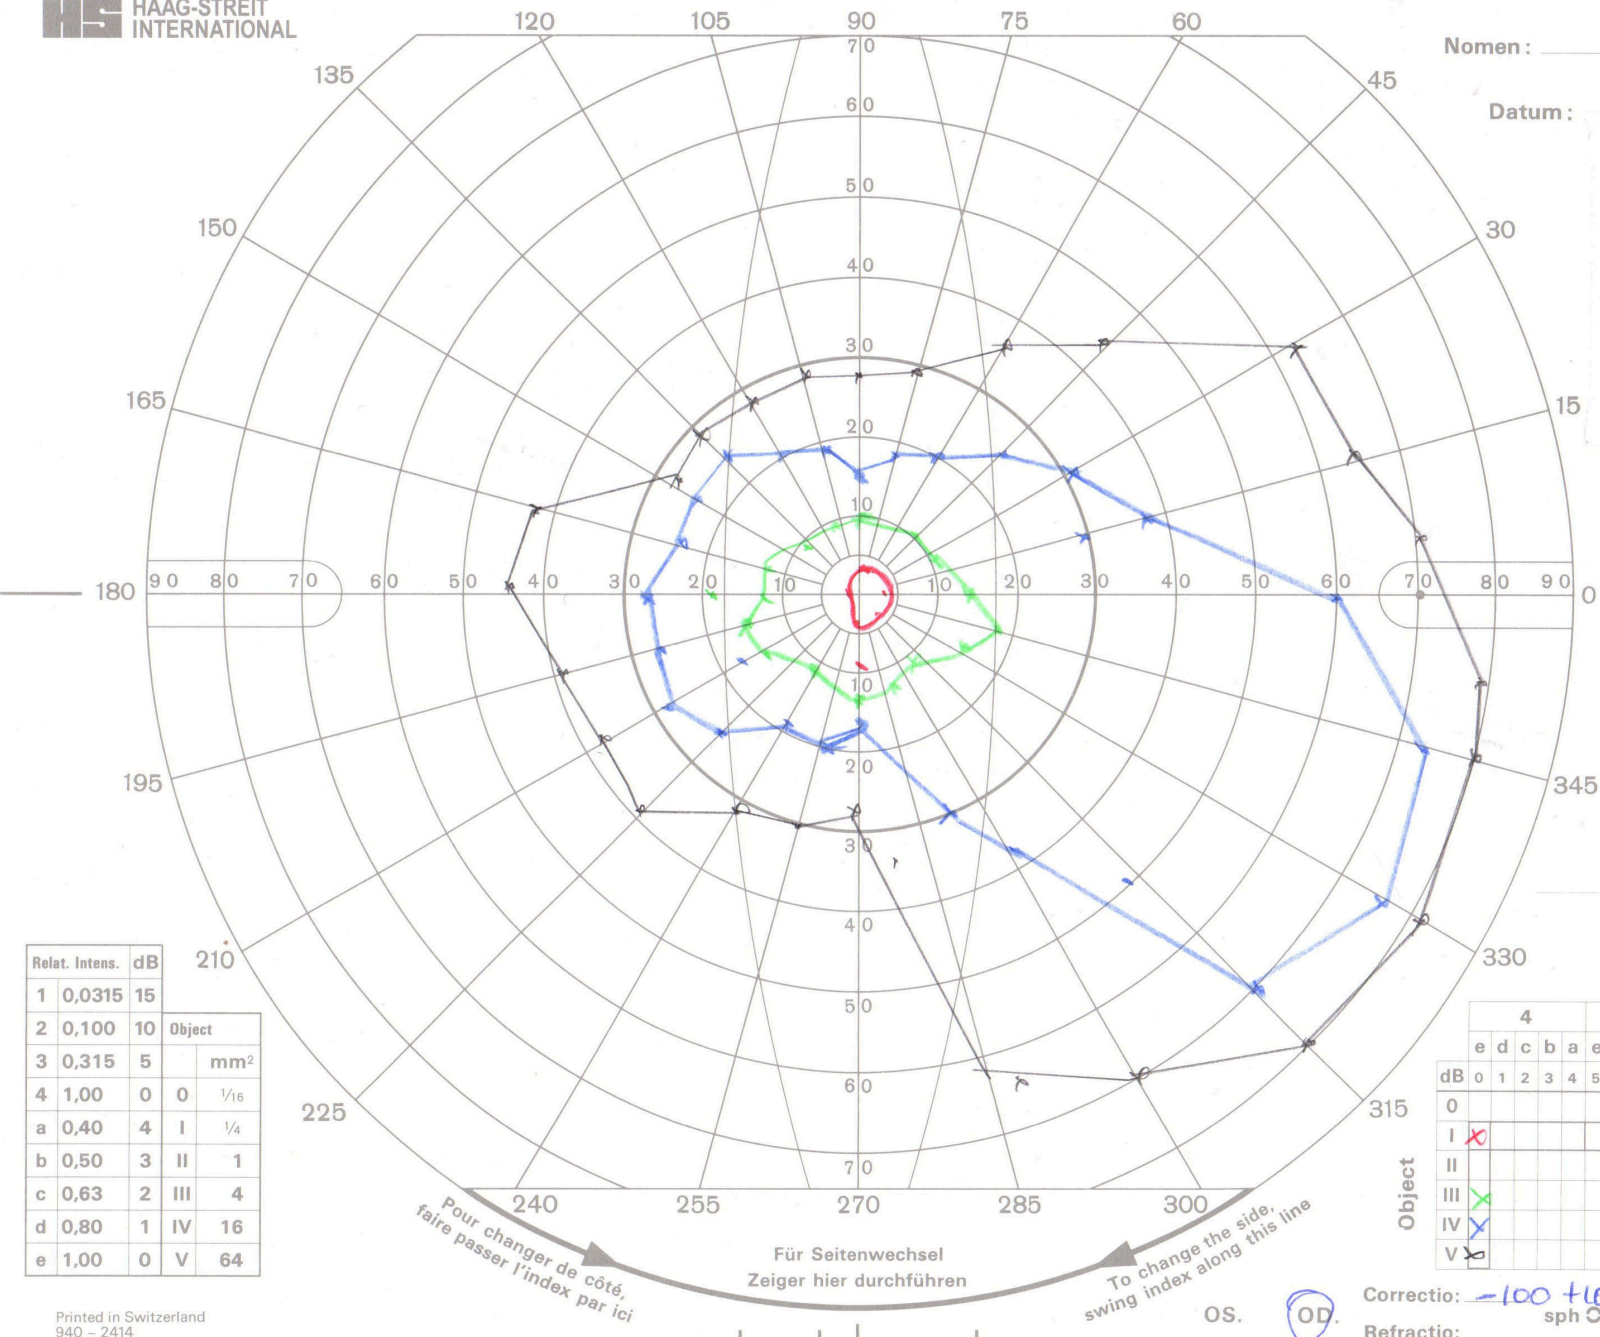

| Relat. Intens. | dB     | Object | mm <sup>2</sup> |
|----------------|--------|--------|-----------------|
| 1              | 0,0315 | 15     |                 |
| 2              | 0,100  | 10     |                 |
| 3              | 0,315  | 5      |                 |
| 4              | 1,00   | 0      | 1/16            |
| a              | 0,40   | I      | 1/4             |
| b              | 0,50   | II     | 1               |
| c              | 0,63   | III    | 4               |
| d              | 0,80   | IV     | 16              |
| e              | 1,00   | V      | 64              |

| dB  | 4 |   |   |   |   |
|-----|---|---|---|---|---|
|     | e | d | c | b | a |
| 0   |   |   |   |   |   |
| I   | X |   |   |   |   |
| II  |   |   |   |   |   |
| III | X |   |   |   |   |
| IV  | X |   |   |   |   |
| V   | X |   |   |   |   |

Correctio: -100 + 100  
Refractio: \_\_\_\_\_ sph C

OS. OD

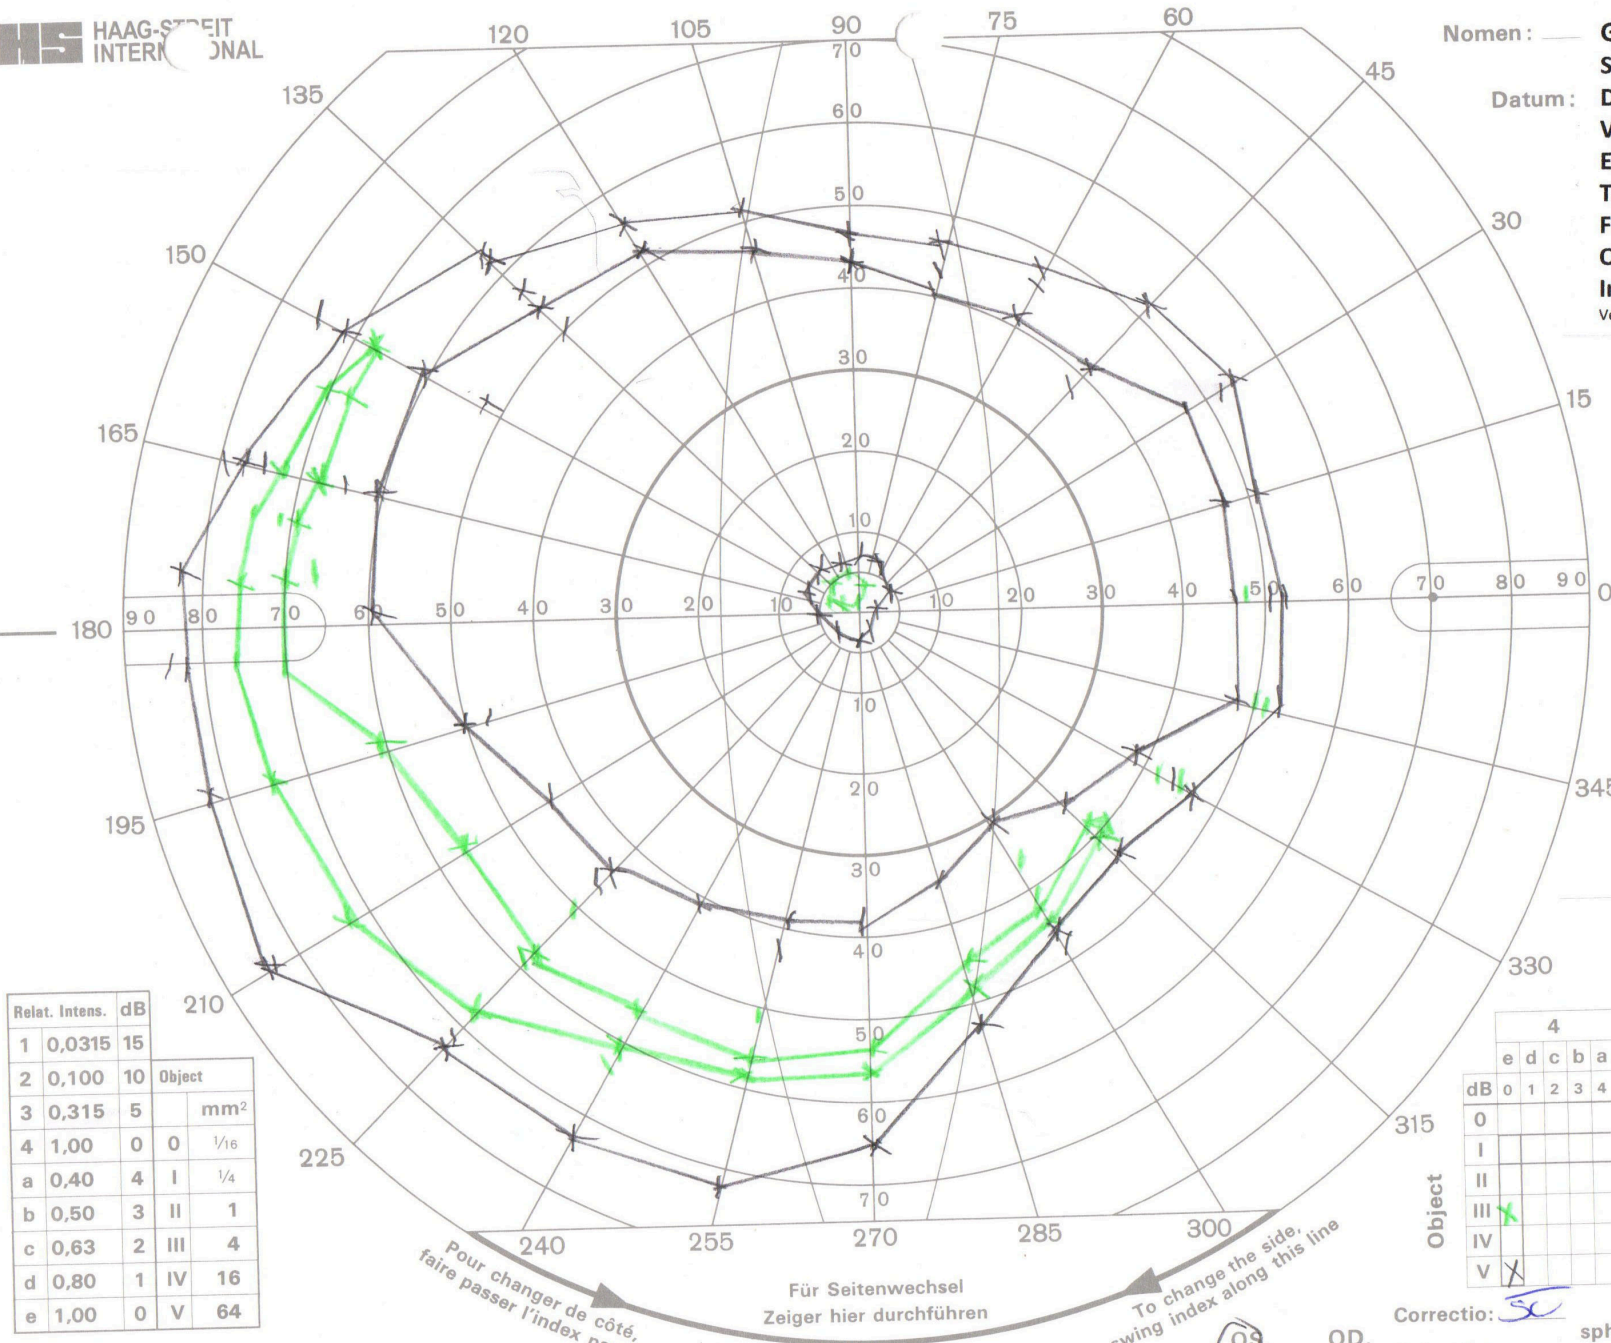

| Relat. Intens. | dB     | Object | mm <sup>2</sup> |
|----------------|--------|--------|-----------------|
| 1              | 0,0315 | 15     |                 |
| 2              | 0,100  | 10     |                 |
| 3              | 0,315  | 5      |                 |
| 4              | 1,00   | 0      | 1/16            |
| a              | 0,40   | I      | 1/4             |
| b              | 0,50   | II     | 1               |
| c              | 0,63   | III    | 4               |
| d              | 0,80   | IV     | 16              |
| e              | 1,00   | V      | 64              |

| dB  | Object |   |   |   |
|-----|--------|---|---|---|
|     | e      | d | c | b |
| 0   |        |   |   |   |
| I   |        |   |   |   |
| II  |        |   |   |   |
| III |        |   |   |   |
| IV  |        |   |   |   |
| V   |        |   |   |   |

Pour changer de côté, faire passer l'index par

Für Seitenwechsel Zeiger hier durchführen

To change the side, swing index along this line

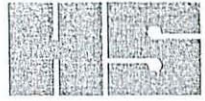

Name: \_\_\_\_\_  
 Datum: \_\_\_\_\_  
 In v. \_\_\_\_\_

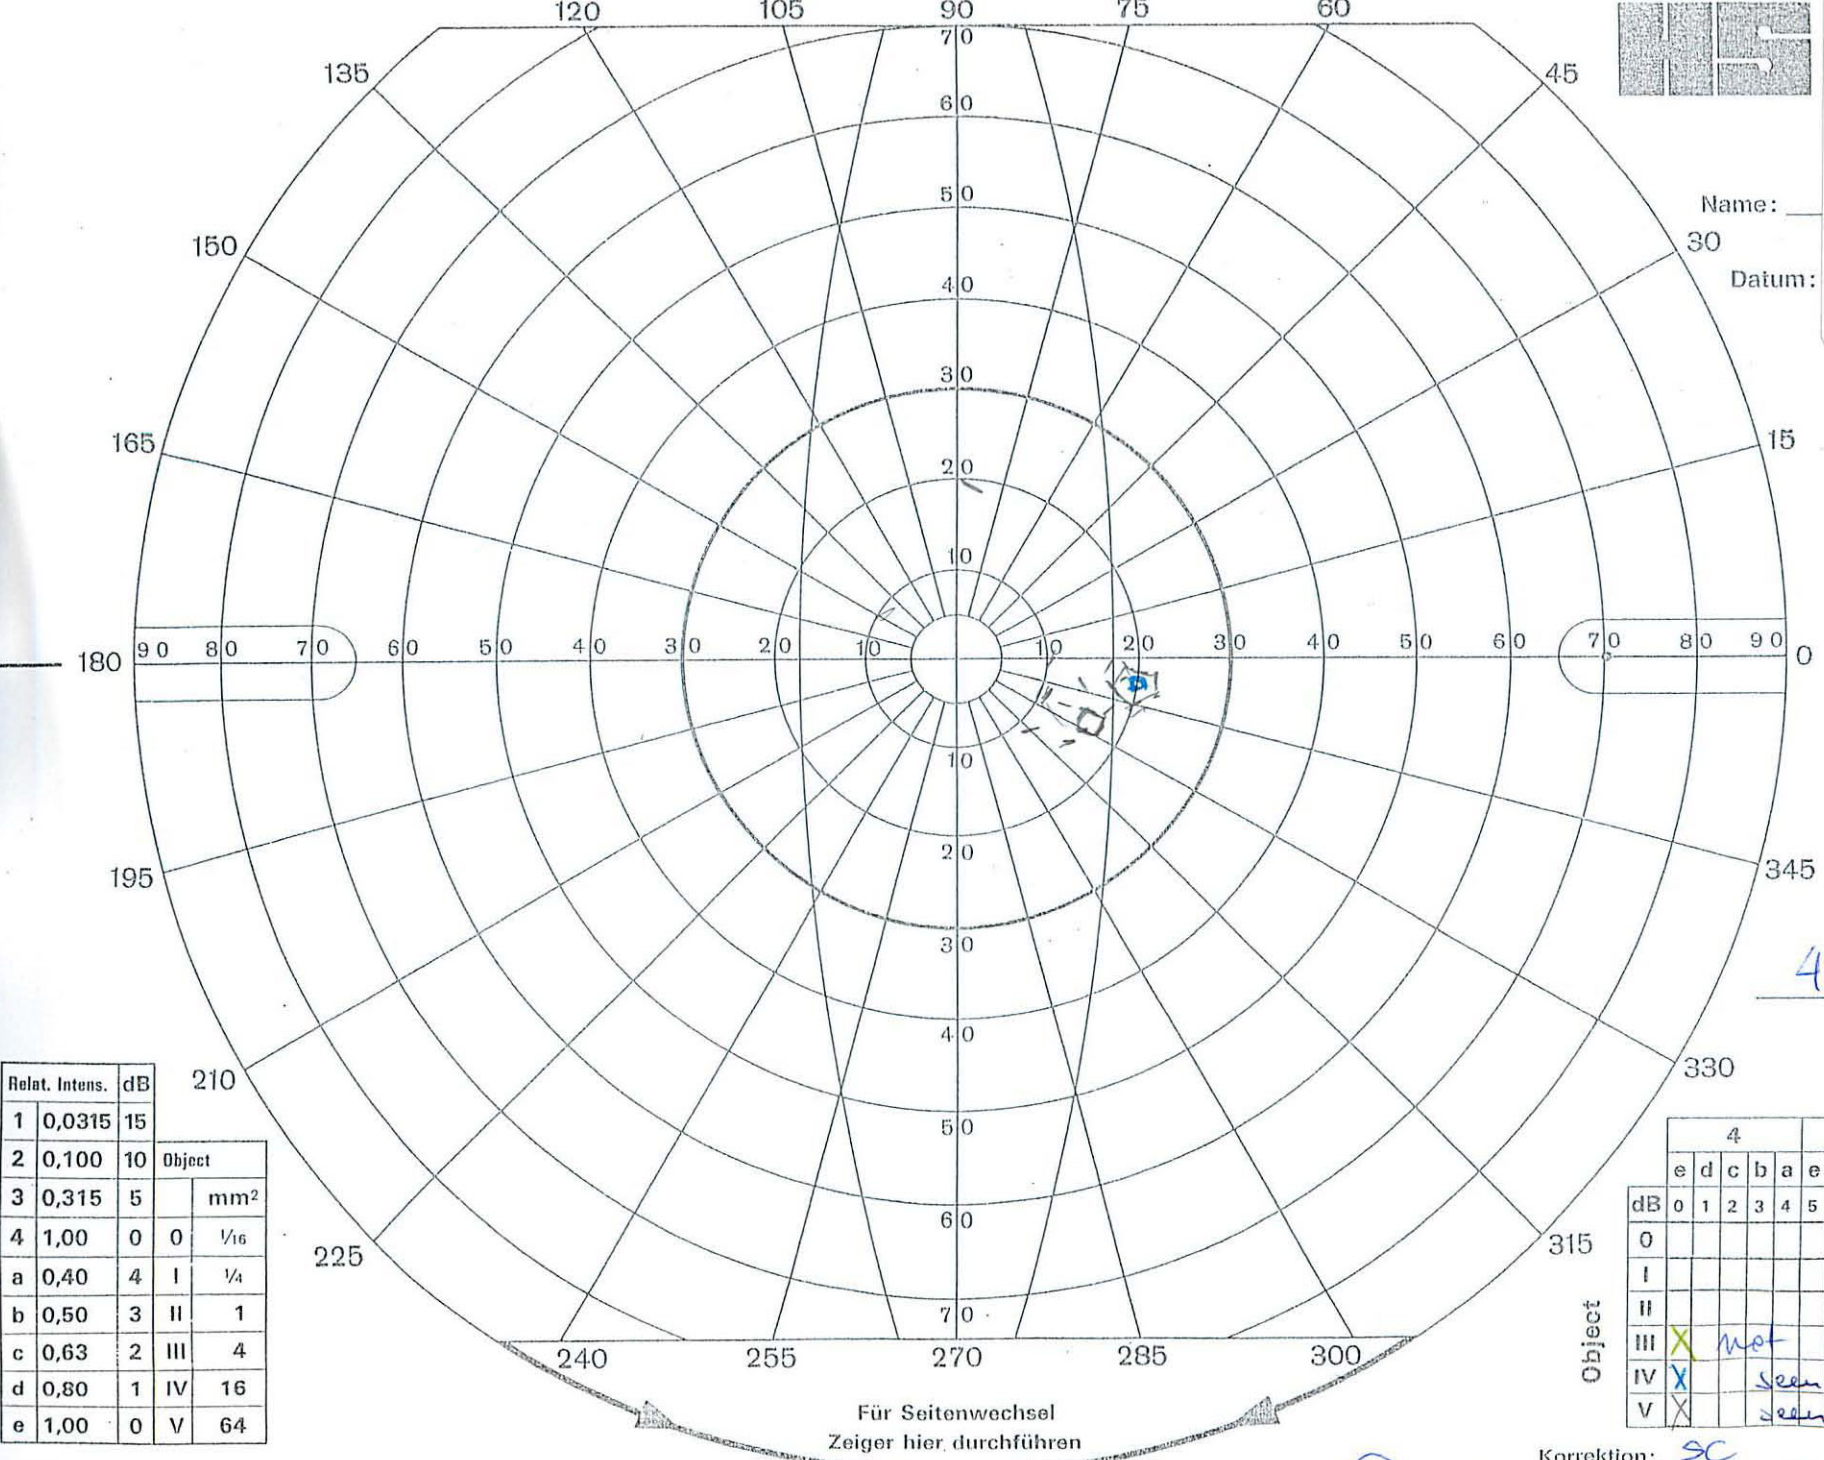

4

| Relat. Intens. | dB     | Object |
|----------------|--------|--------|
| 1              | 0,0315 | 15     |
| 2              | 0,100  | 10     |
| 3              | 0,315  | 5      |
| 4              | 1,00   | 0      |
| a              | 0,40   | I      |
| b              | 0,50   | II     |
| c              | 0,63   | III    |
| d              | 0,80   | IV     |
| e              | 1,00   | V      |

| dB  | 4 |   |   |      |   |   |
|-----|---|---|---|------|---|---|
|     | e | d | c | b    | a | e |
| 0   |   |   |   |      |   |   |
| I   |   |   |   |      |   |   |
| II  |   |   |   |      |   |   |
| III | X |   |   | not  |   | X |
| IV  | X |   |   | seen |   |   |
| V   | X |   |   | seen |   |   |

Für Seitenwechsel  
 Zeiger hier durchführen

OS

OD.

Korrektur: SC

Refraktion:

sph 0

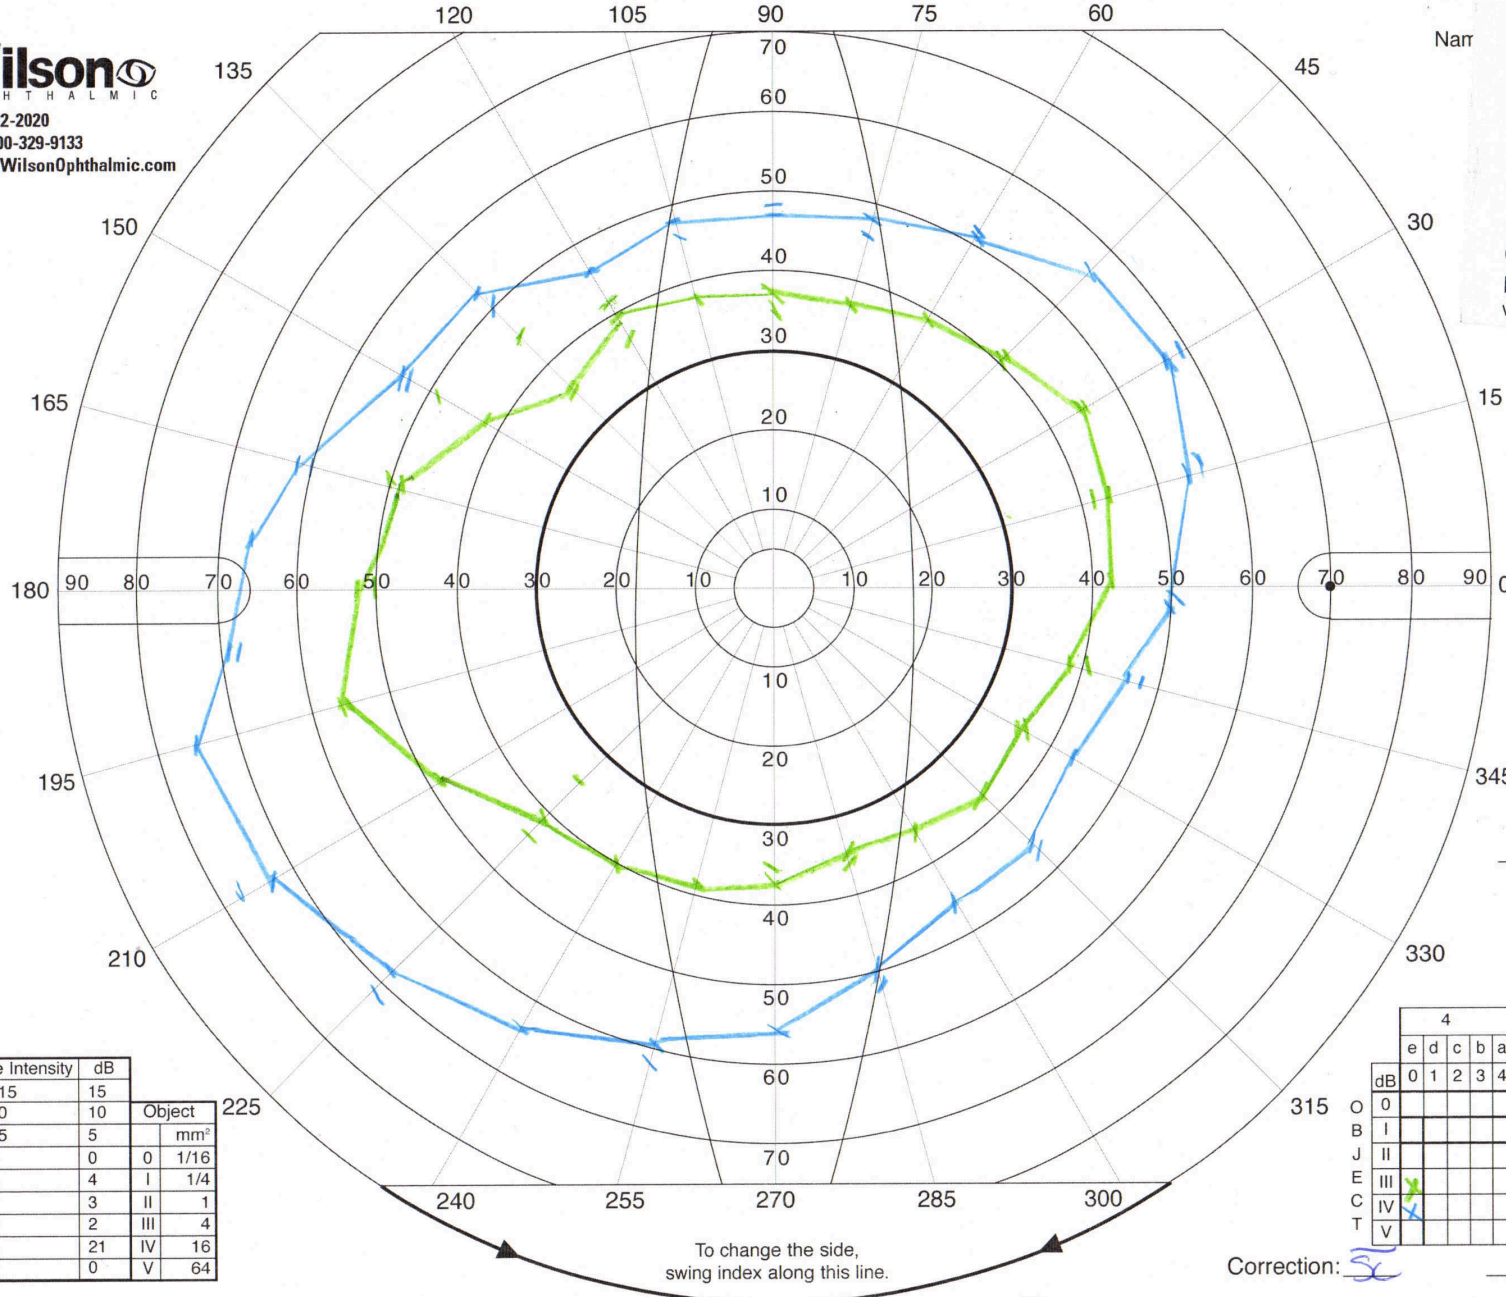

| Relative Intensity | dB     | Object |                 |
|--------------------|--------|--------|-----------------|
| 1                  | 0.0315 | 15     |                 |
| 2                  | 0.100  | 10     |                 |
| 3                  | 0.315  | 5      | mm <sup>2</sup> |
| 4                  | 1.00   | 0      | 0 1/16          |
| a                  | 0.40   | 4      | I 1/4           |
| b                  | 0.50   | 3      | II 1            |
| c                  | 0.63   | 2      | III 4           |
| d                  | 0.80   | 21     | IV 16           |
| e                  | 1.00   | 0      | V 64            |

|     | 4 | 3 | 2 | 1 | 0 |   |
|-----|---|---|---|---|---|---|
| e   |   |   |   |   |   |   |
| d   |   |   |   |   |   |   |
| c   |   |   |   |   |   |   |
| b   |   |   |   |   |   |   |
| a   |   |   |   |   |   |   |
| e   |   |   |   |   |   |   |
| dB  | 0 | 1 | 2 | 3 | 4 | 5 |
| O   |   |   |   |   |   |   |
| B   |   |   |   |   |   |   |
| I   |   |   |   |   |   |   |
| J   |   |   |   |   |   |   |
| II  |   |   |   |   |   |   |
| III |   |   |   |   |   |   |
| C   |   |   |   |   |   |   |
| IV  |   |   |   |   |   |   |
| T   |   |   |   |   |   |   |
| V   |   |   |   |   |   |   |

To change the side, swing index along this line.

Correction: SC

Refraction: \_\_\_\_\_ Sph  $\ominus$



Nomen: \_\_\_\_\_  
 Subject: \_\_\_\_\_  
 Date: \_\_\_\_\_  
 Datum: \_\_\_\_\_  
 Visit: \_\_\_\_\_  
 Eye:  O  S  
 Time: \_\_\_\_\_  
 Fixation: \_\_\_\_\_  
 Operation: \_\_\_\_\_  
 Intensity: \_\_\_\_\_  
 Version: \_\_\_\_\_

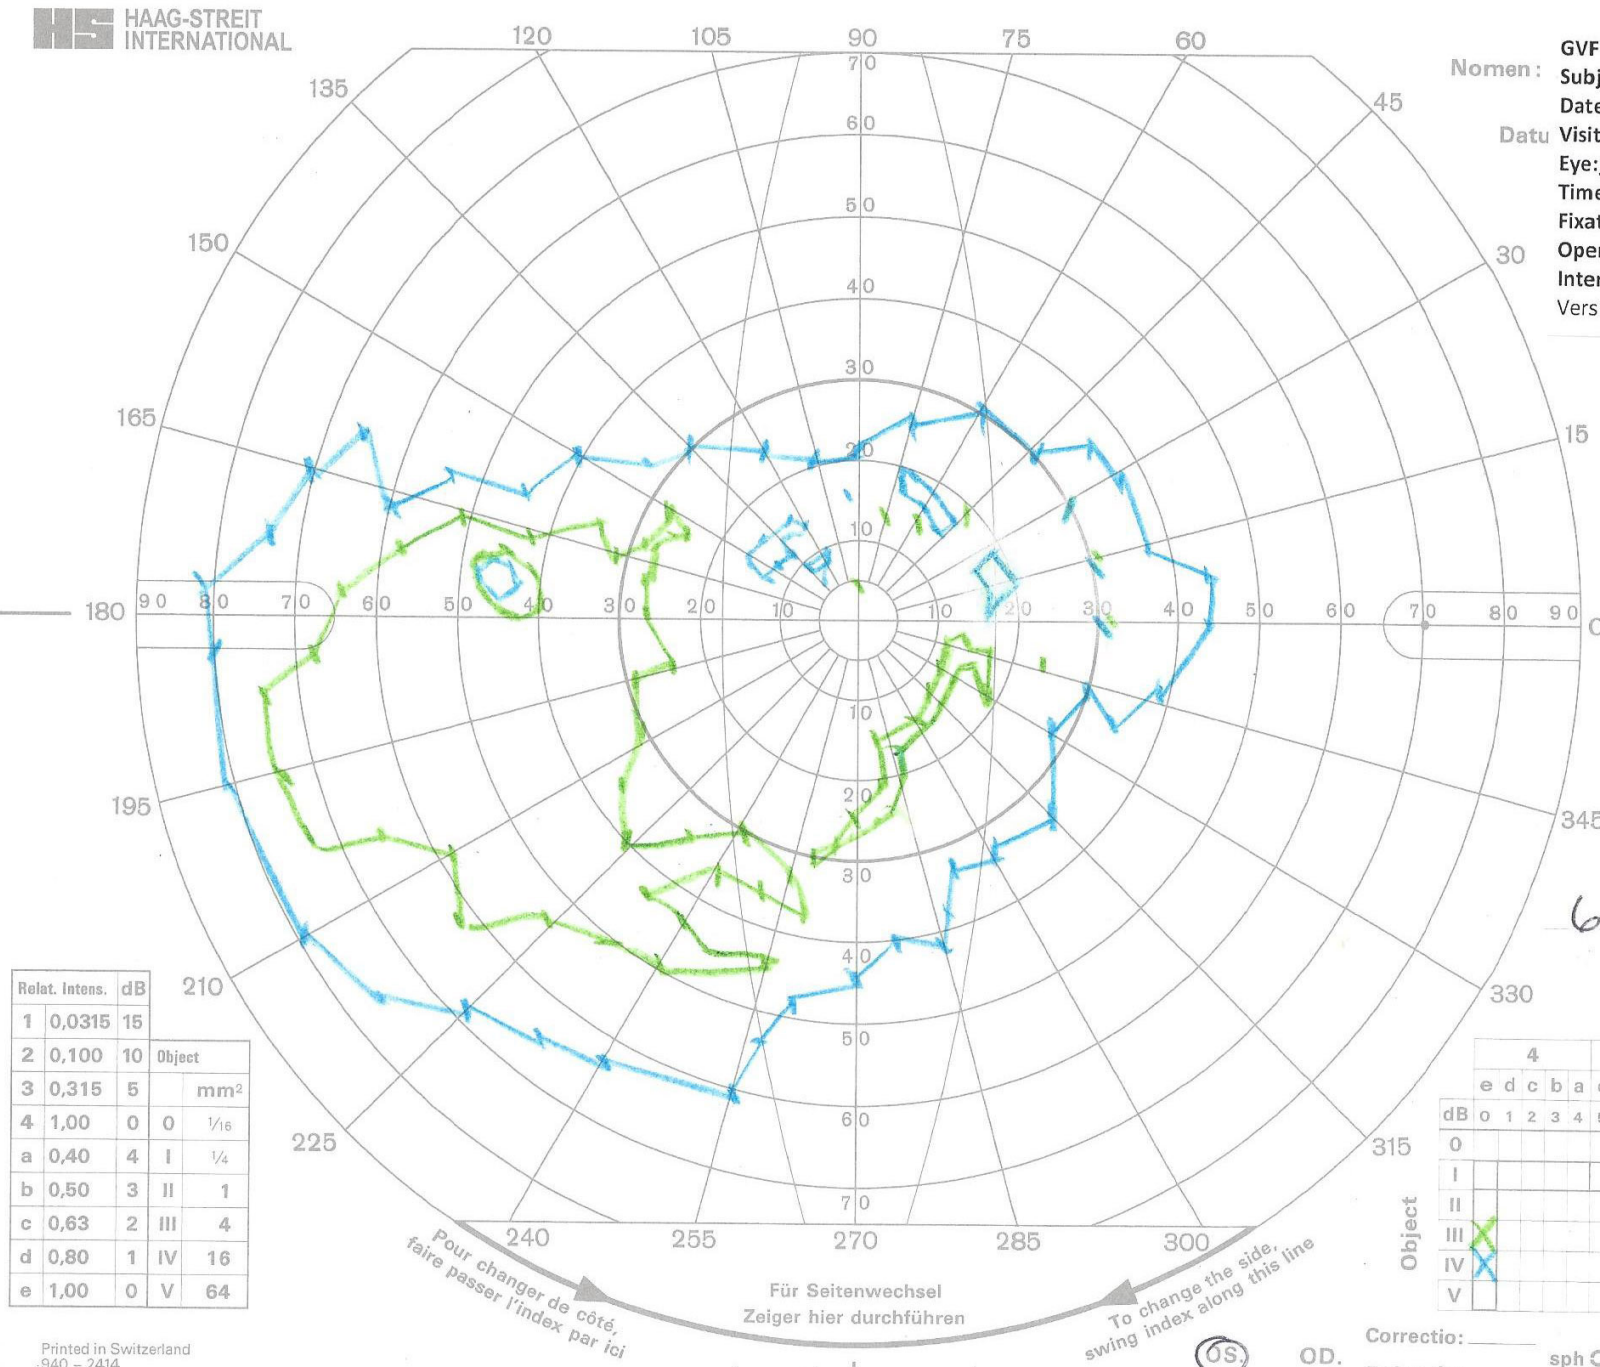

| Relat. Intens. | dB     | Object |                 |
|----------------|--------|--------|-----------------|
|                |        |        | mm <sup>2</sup> |
| 1              | 0,0315 | 15     |                 |
| 2              | 0,100  | 10     |                 |
| 3              | 0,315  | 5      |                 |
| 4              | 1,00   | 0      | 1/16            |
| a              | 0,40   | I      | 1/4             |
| b              | 0,50   | II     | 1               |
| c              | 0,63   | III    | 4               |
| d              | 0,80   | IV     | 16              |
| e              | 1,00   | V      | 64              |

| dB  | Object |   |   |   |   |
|-----|--------|---|---|---|---|
|     | e      | d | c | b | a |
| 0   |        |   |   |   |   |
| I   |        |   |   |   |   |
| II  |        |   |   |   |   |
| III |        |   |   |   |   |
| IV  |        |   |   |   |   |
| V   |        |   |   |   |   |

Pour changer de côté, faire passer l'index par ici

Für Seitenwechsel Zeiger hier durchführen

To change the side, swing index along this line

Nomen: \_\_\_\_\_

Datum: \_\_\_\_\_

GV  
Sub  
Dat  
Visi  
Eye  
Tim  
Fixa  
Ope  
Inte  
versi

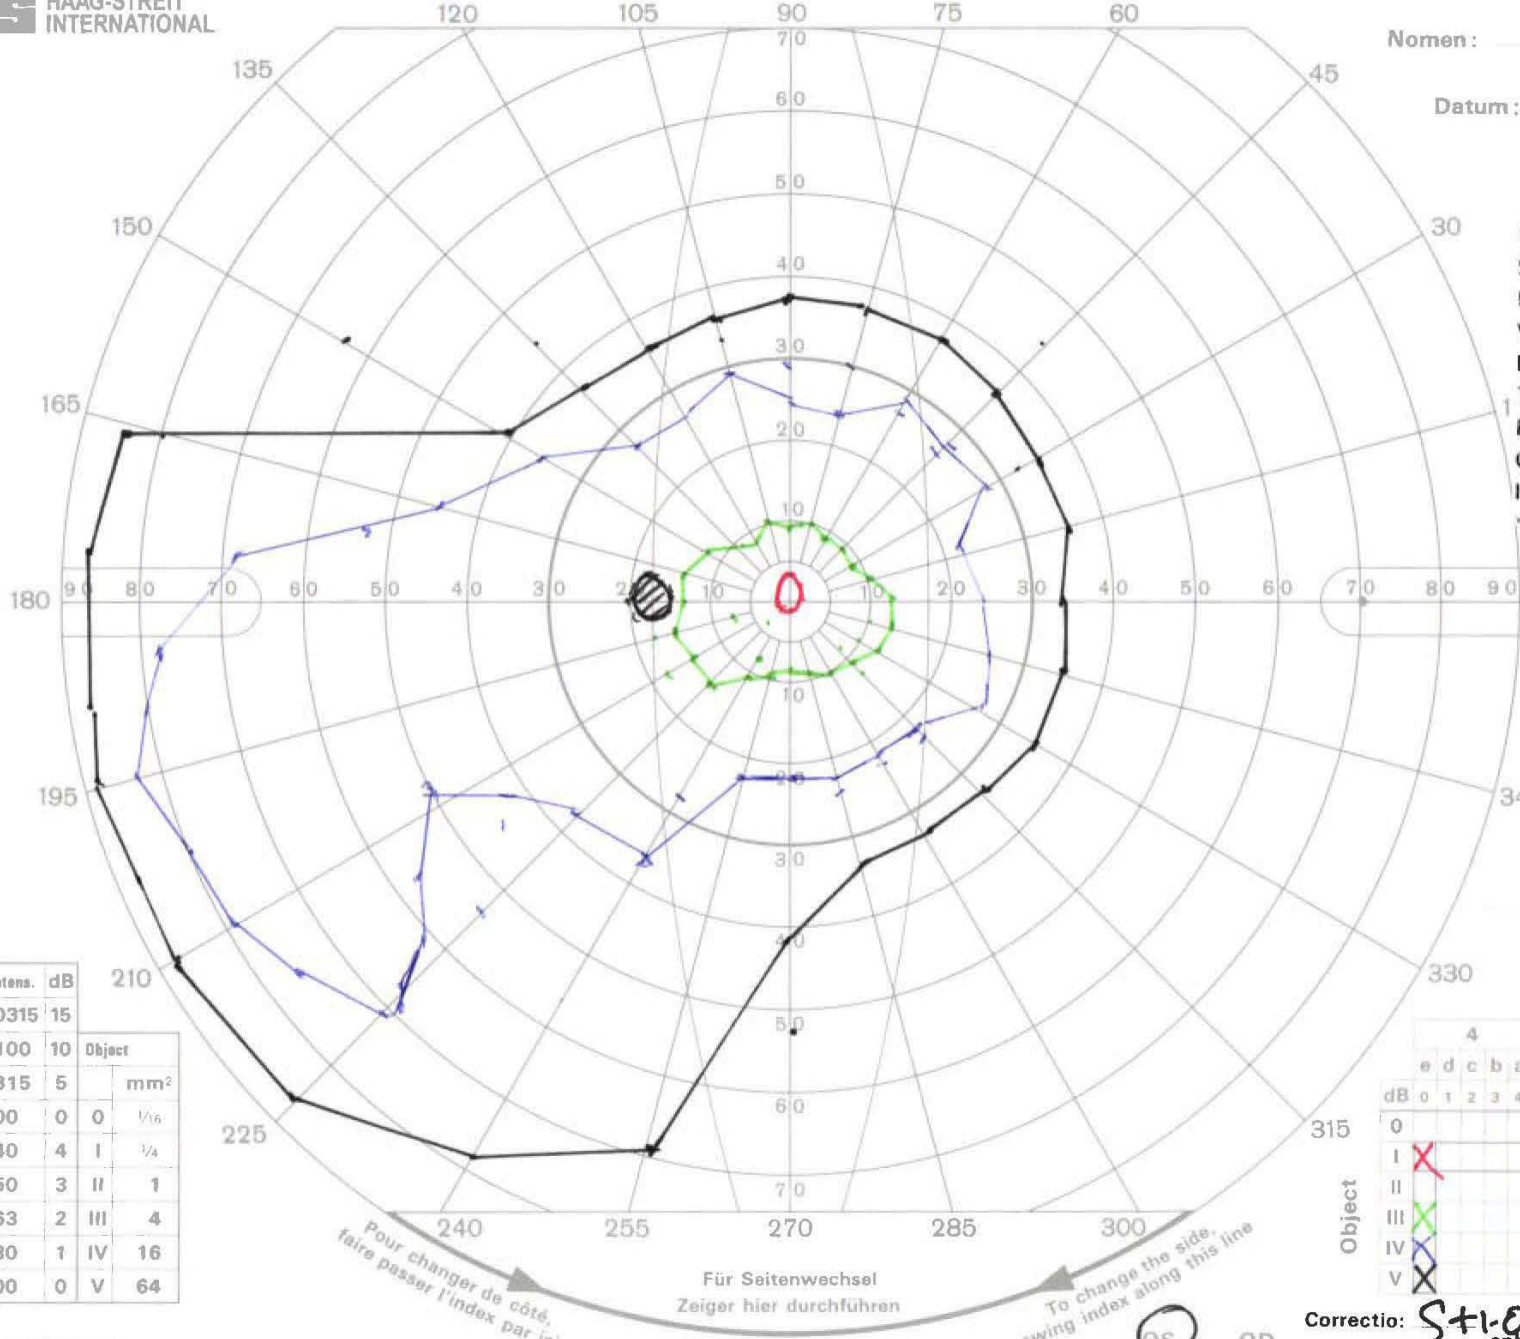

| Relat. Intens. dB |        | Object |      |
|-------------------|--------|--------|------|
| 1                 | 0,0315 | 15     |      |
| 2                 | 0,100  | 10     |      |
| 3                 | 0,315  | 5      |      |
| 4                 | 1,00   | 0      | 1/16 |
| a                 | 0,40   | I      | 1/4  |
| b                 | 0,50   | II     | 1    |
| c                 | 0,63   | III    | 4    |
| d                 | 0,80   | IV     | 16   |
| e                 | 1,00   | V      | 64   |

|     | 4 |   |   |   |   |   |   |
|-----|---|---|---|---|---|---|---|
|     | e | d | c | b | a |   | e |
| dB  | 0 | 1 | 2 | 3 | 4 | 5 |   |
| 0   |   |   |   |   |   |   |   |
| I   |   |   |   |   |   |   |   |
| II  |   |   |   |   |   |   |   |
| III |   |   |   |   |   |   |   |
| IV  |   |   |   |   |   |   |   |
| V   |   |   |   |   |   |   |   |

Pour changer de côté, faire passer l'index par ici

Für Seitenwechsel Zeiger hier durchführen

To change the side, swing index along this line

Correctio: **S+1.0**

Refractio: **sply**

NAME: \_\_\_\_\_

DATE: \_\_\_\_\_

Diap: \_\_\_\_\_

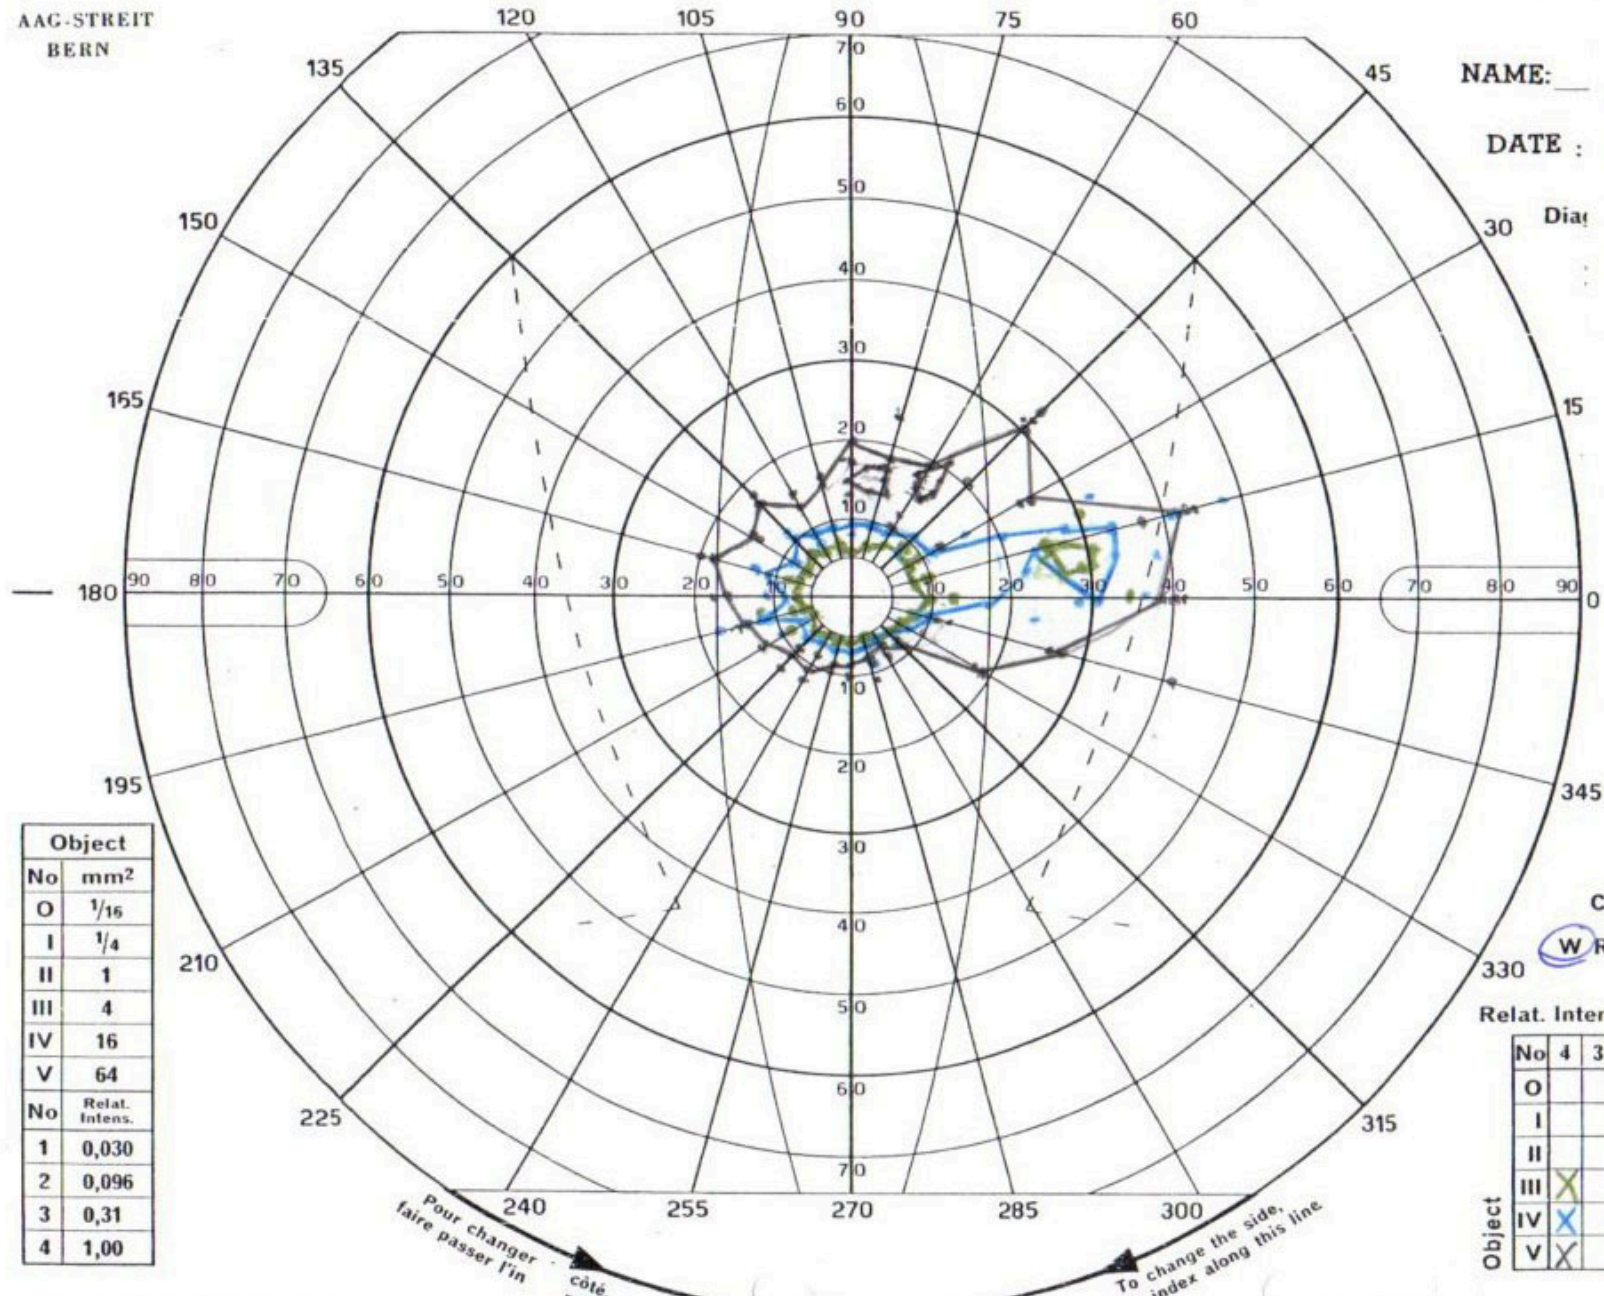

| Object |                 |
|--------|-----------------|
| No     | mm <sup>2</sup> |
| O      | 1/16            |
| I      | 1/4             |
| II     | 1               |
| III    | 4               |
| IV     | 16              |
| V      | 64              |
| No     | Relat. Intens.  |
| 1      | 0,030           |
| 2      | 0,096           |
| 3      | 0,31            |
| 4      | 1,00            |

Co  
WR

Relat. Intens

| Object | No 4 3 |  |
|--------|--------|--|
|        | O      |  |
| I      |        |  |
| II     |        |  |
| III    | X      |  |
| IV     | X      |  |
| V      | X      |  |

Pour changer faire passer l'in côté, par ici

To change the side, swing index along this line

Nomen: \_\_\_\_\_

Datum: \_\_\_\_\_

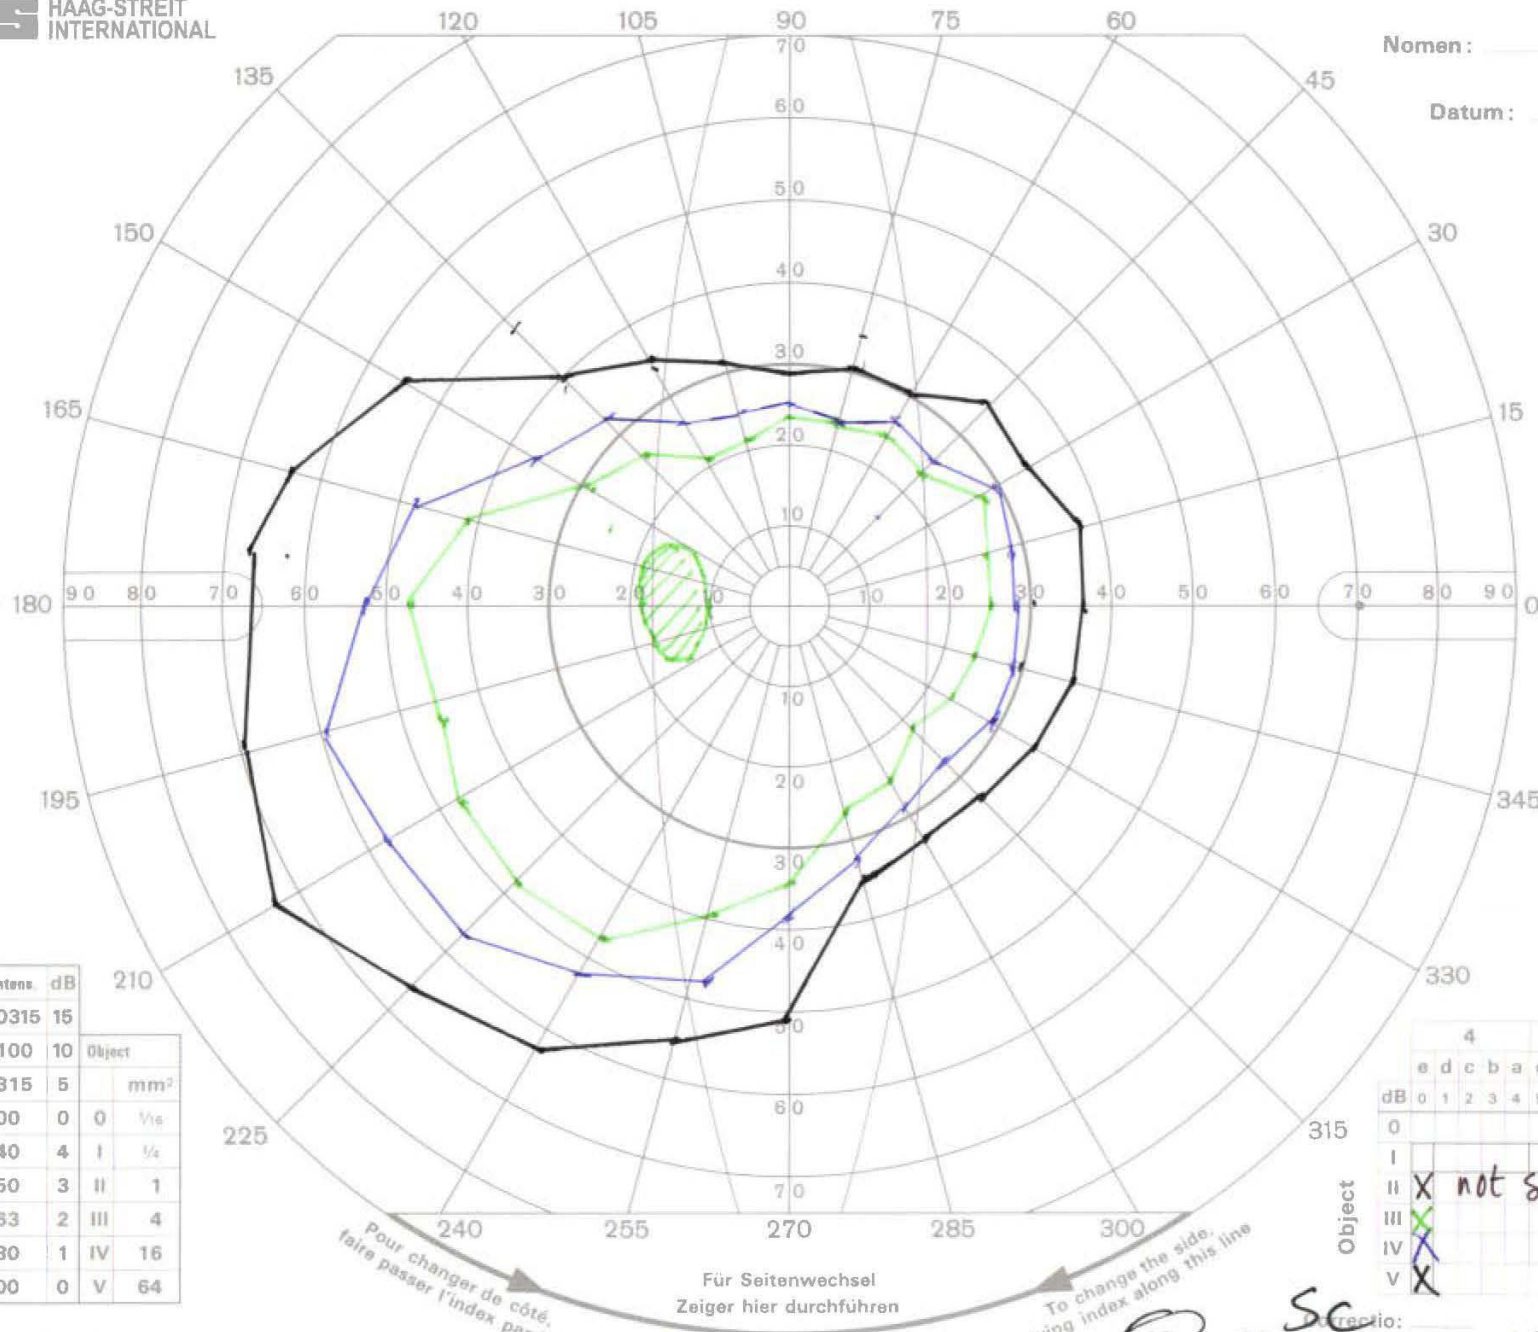

| Relat. Intens. | dB     | Object | mm <sup>2</sup> |
|----------------|--------|--------|-----------------|
| 1              | 0,0315 | 15     |                 |
| 2              | 0,100  | 10     |                 |
| 3              | 0,315  | 5      |                 |
| 4              | 1,00   | 0      | 0               |
| a              | 0,40   | 4      | I 1/4           |
| b              | 0,50   | 3      | II 1            |
| c              | 0,63   | 2      | III 4           |
| d              | 0,80   | 1      | IV 16           |
| e              | 1,00   | 0      | V 64            |

| dB  | 0 | 1 | 2 | 3 | 4 | 5 |
|-----|---|---|---|---|---|---|
| 0   |   |   |   |   |   |   |
| I   |   |   |   |   |   |   |
| II  |   |   |   |   |   |   |
| III |   |   |   |   |   |   |
| IV  |   |   |   |   |   |   |
| V   |   |   |   |   |   |   |

Object

not se

Pour changer de côté, faire passer l'index par ici

Für Seitenwechsel Zeiger hier durchführen

To change the side, swing index along this line

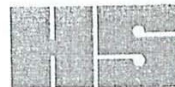

Name: \_\_\_\_\_

Datum: \_\_\_\_\_

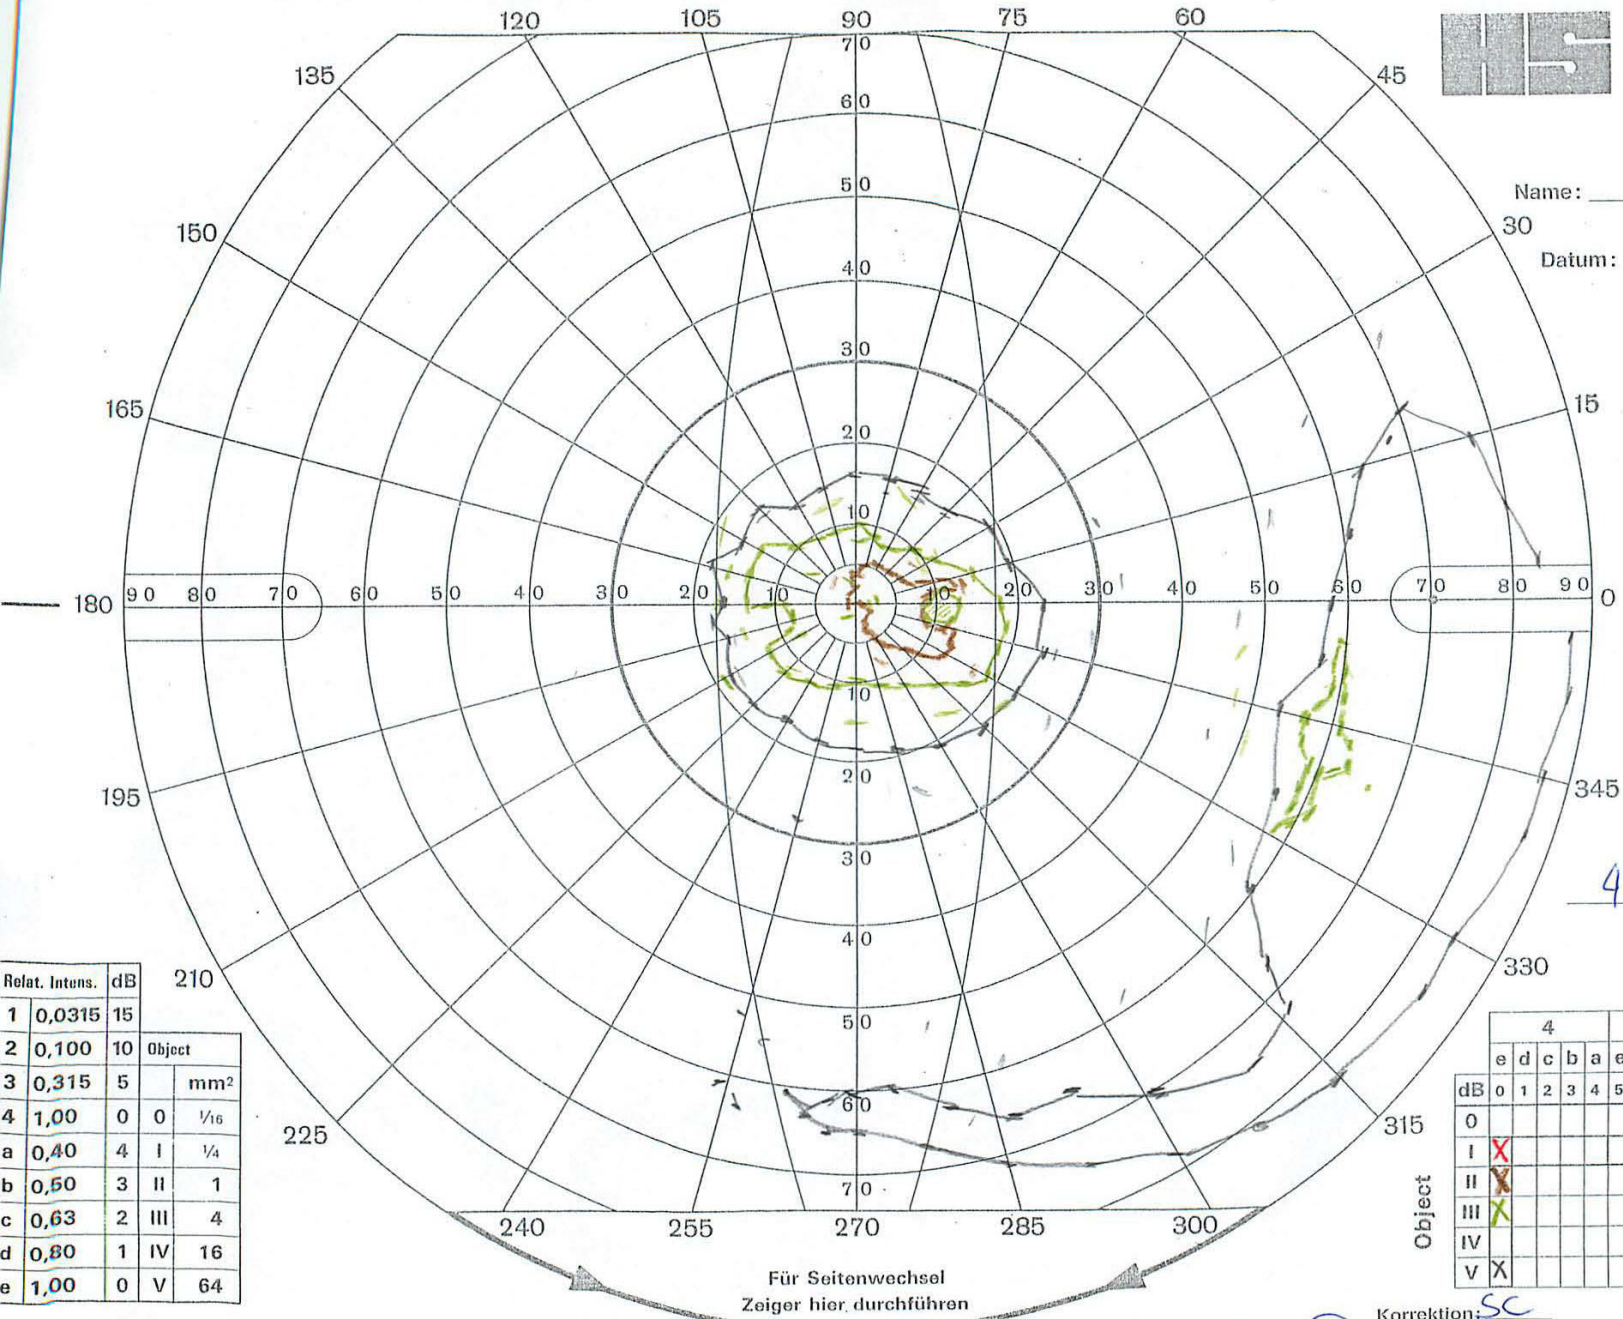

| Relat. Intens. | dB     | Object | mm <sup>2</sup> |
|----------------|--------|--------|-----------------|
| 1              | 0,0315 | 15     |                 |
| 2              | 0,100  | 10     |                 |
| 3              | 0,315  | 5      |                 |
| 4              | 1,00   | 0      | 1/16            |
| a              | 0,40   | 4      | I 1/4           |
| b              | 0,50   | 3      | II 1            |
| c              | 0,63   | 2      | III 4           |
| d              | 0,80   | 1      | IV 16           |
| e              | 1,00   | 0      | V 64            |

| dB  | 4 |   |   |   |   |
|-----|---|---|---|---|---|
|     | e | d | c | b | a |
| 0   |   |   |   |   |   |
| I   | X |   |   |   |   |
| II  | X |   |   |   |   |
| III | X |   |   |   |   |
| IV  |   |   |   |   |   |
| V   | X |   |   |   |   |

Für Seitenwechsel  
Zeiger hier durchführen

OS.

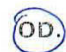

Korrektion: SC

Refraktion:

sph 0

4

330

Object

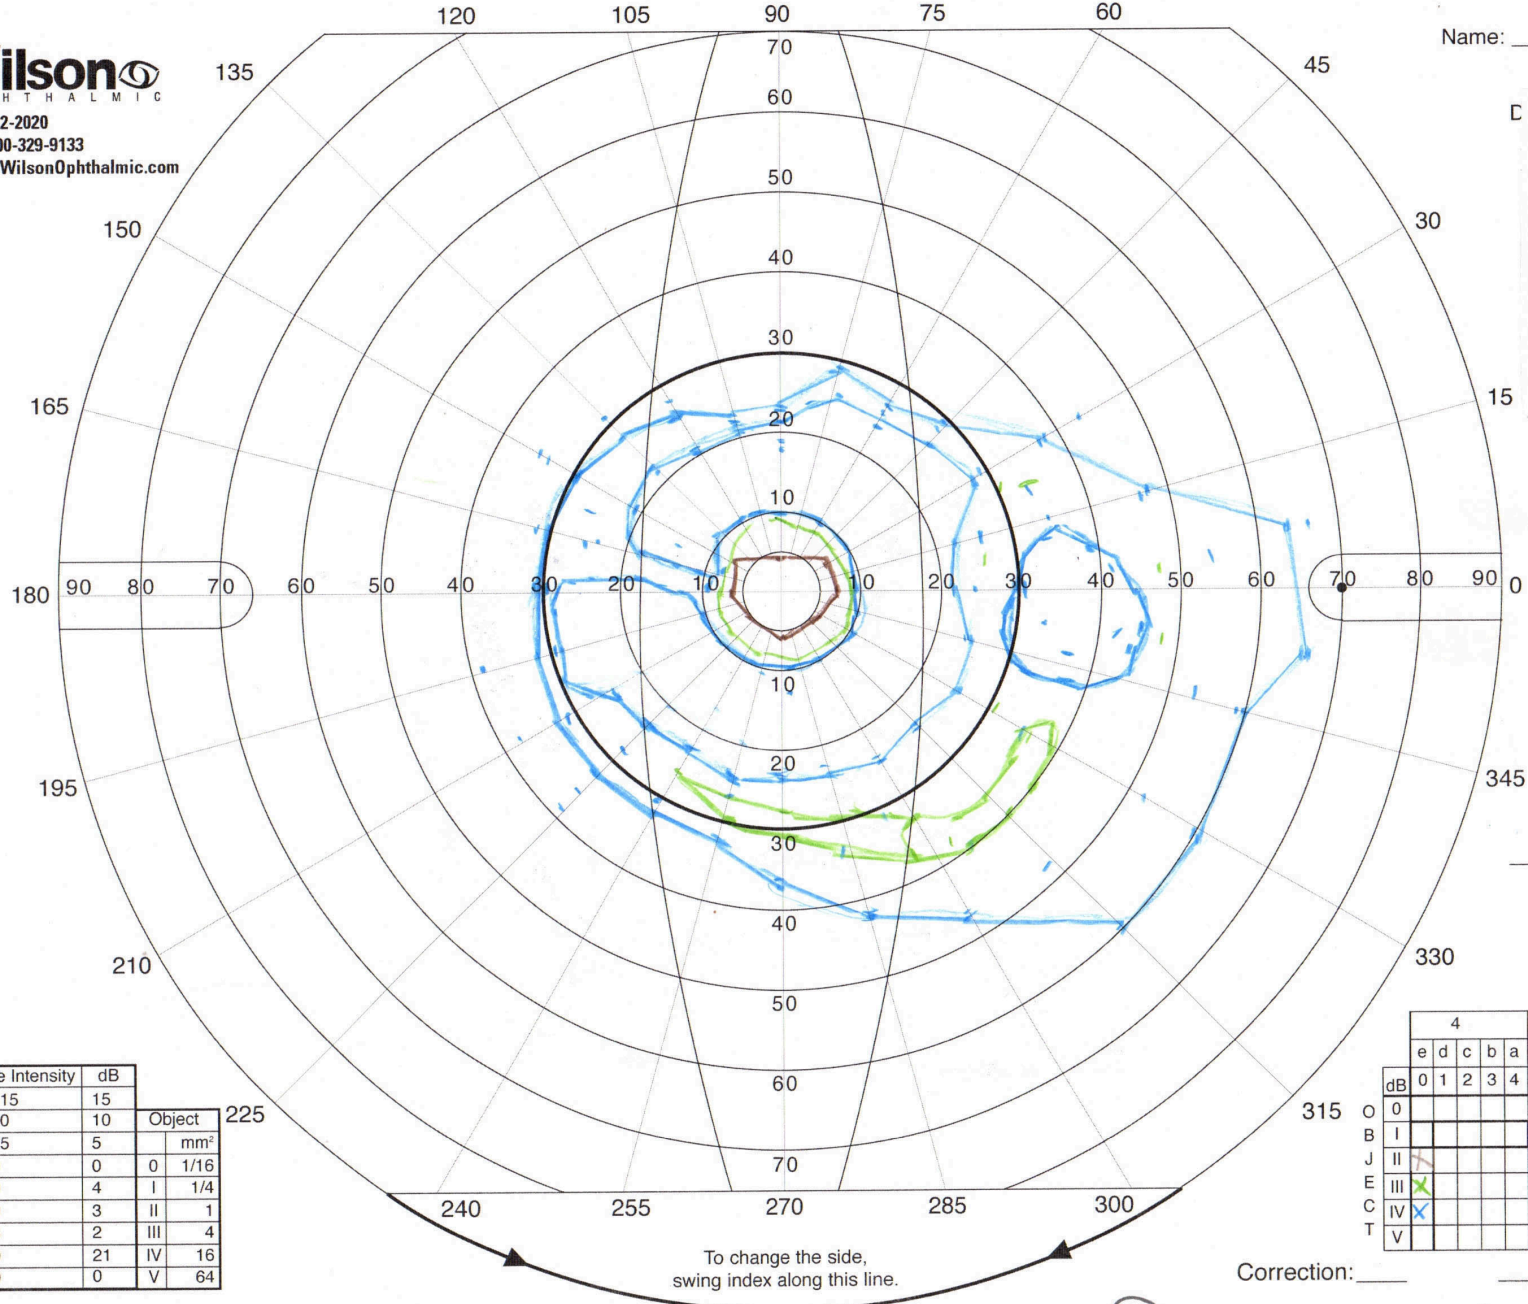

| Relative Intensity | dB     | Object |       |
|--------------------|--------|--------|-------|
| 1                  | 0.0315 | 15     |       |
| 2                  | 0.100  | 10     |       |
| 3                  | 0.315  | 5      |       |
| 4                  | 1.00   | 0      | 1/16  |
| a                  | 0.40   | 4      | I 1/4 |
| b                  | 0.50   | 3      | II 1  |
| c                  | 0.63   | 2      | III 4 |
| d                  | 0.80   | 21     | IV 16 |
| e                  | 1.00   | 0      | V 64  |

|     | 4 |   |   |   |   |   |
|-----|---|---|---|---|---|---|
|     | e | d | c | b | a | e |
| dB  | 0 | 1 | 2 | 3 | 4 | 5 |
| O   |   |   |   |   |   |   |
| B   |   |   |   |   |   |   |
| I   |   |   |   |   |   |   |
| J   |   |   |   |   |   |   |
| II  |   |   |   |   |   |   |
| E   |   |   |   |   |   |   |
| III |   |   |   |   |   |   |
| C   |   |   |   |   |   |   |
| IV  |   |   |   |   |   |   |
| T   |   |   |   |   |   |   |
| V   |   |   |   |   |   |   |

To change the side,  
swing index along this line.

AAG-STREIT  
BERN

NAME: \_\_\_\_\_  
 DATE \_\_\_\_\_  
 D \_\_\_\_\_  
 T \_\_\_\_\_  
 F \_\_\_\_\_  
 O \_\_\_\_\_  
 I \_\_\_\_\_  
 V \_\_\_\_\_

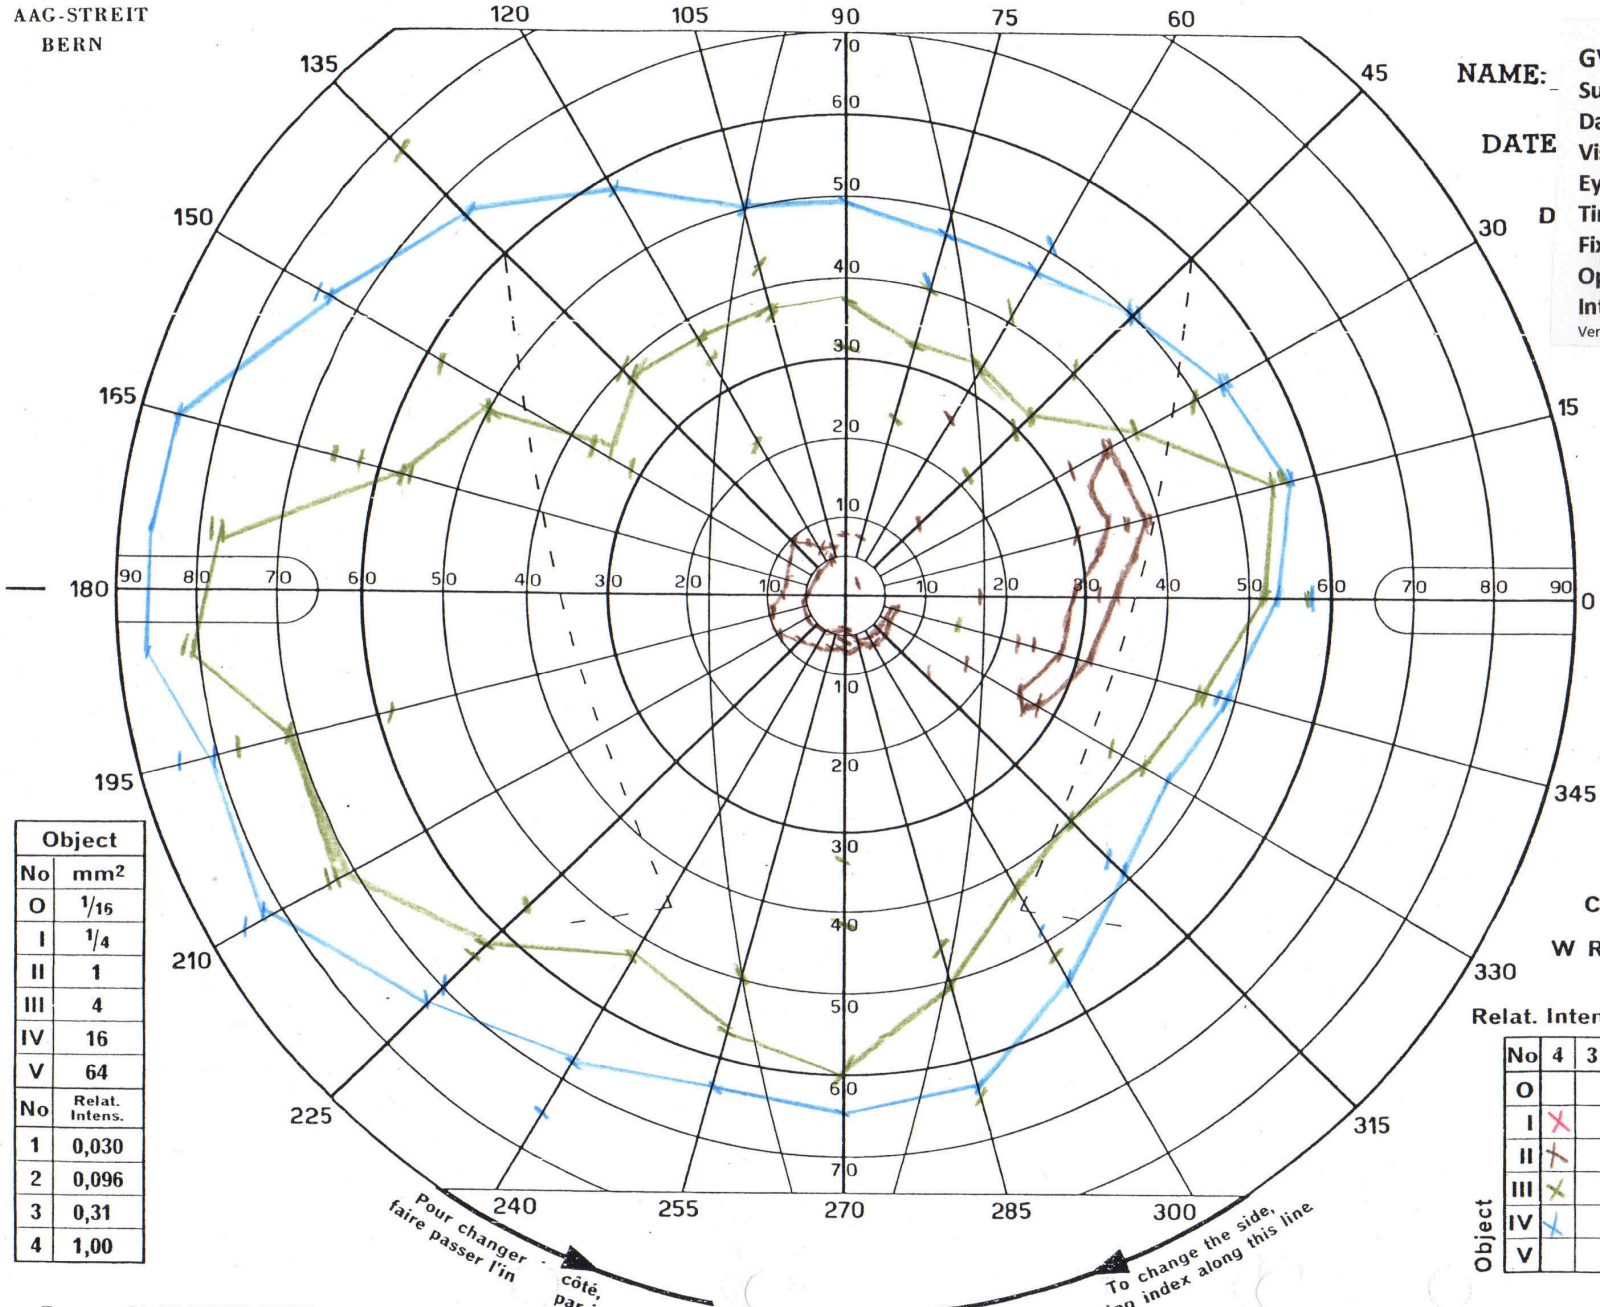

| Object |                 |
|--------|-----------------|
| No     | mm <sup>2</sup> |
| O      | 1/16            |
| I      | 1/4             |
| II     | 1               |
| III    | 4               |
| IV     | 16              |
| V      | 64              |
| No     | Relat. Intens.  |
| 1      | 0,030           |
| 2      | 0,096           |
| 3      | 0,31            |
| 4      | 1,00            |

| Relat. Inten |     |
|--------------|-----|
| No           | 4 3 |
| O            |     |
| I            | ✕   |
| II           | +   |
| III          | ×   |
| IV           | ✕   |
| V            |     |

Pour changer  
faire passer l'in  
côté, par :

To change the side,  
ing index along this line

Nomen: \_\_\_\_\_  
 Datum: \_\_\_\_\_  
 Vis: \_\_\_\_\_  
 Ey: \_\_\_\_\_  
 Tir: \_\_\_\_\_  
 Fix: \_\_\_\_\_  
 Op: \_\_\_\_\_  
 Int: \_\_\_\_\_  
 Vers: \_\_\_\_\_

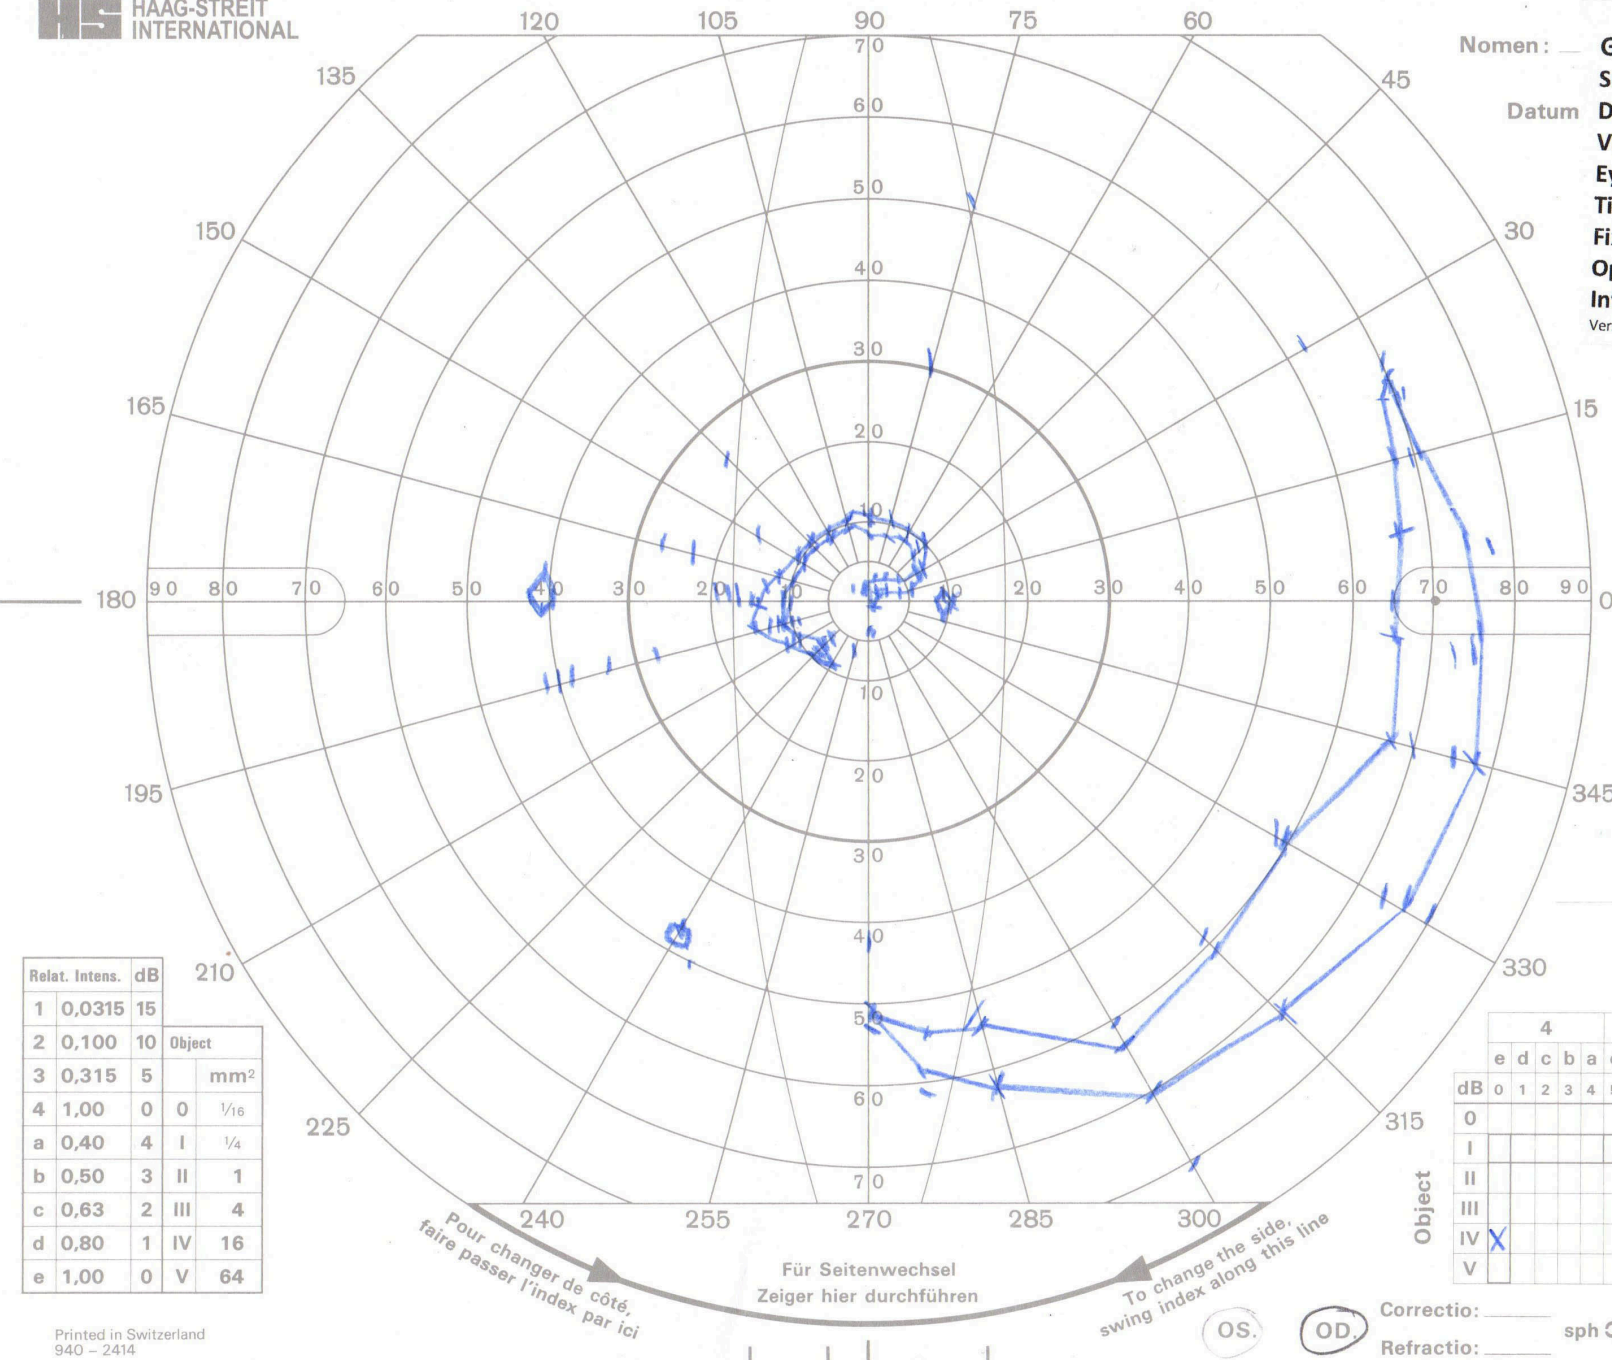

| Relat. Intens. | dB     | Object |                 |
|----------------|--------|--------|-----------------|
| 1              | 0,0315 | 15     |                 |
| 2              | 0,100  | 10     |                 |
| 3              | 0,315  | 5      |                 |
| 4              | 1,00   | 0      | mm <sup>2</sup> |
| a              | 0,40   | 4      | I 1/4           |
| b              | 0,50   | 3      | II 1            |
| c              | 0,63   | 2      | III 4           |
| d              | 0,80   | 1      | IV 16           |
| e              | 1,00   | 0      | V 64            |

| dB  | 4 |   |   |   |   |
|-----|---|---|---|---|---|
|     | e | d | c | b | a |
| 0   |   |   |   |   |   |
| I   |   |   |   |   |   |
| II  |   |   |   |   |   |
| III |   |   |   |   |   |
| IV  | X |   |   |   |   |
| V   |   |   |   |   |   |

Pour changer de côté,  
faire passer l'index par ici

Für Seitenwechsel  
Zeiger hier durchführen

To change the side,  
swing index along this line

OS. OD.

Correctio: \_\_\_\_\_  
 Refractio: \_\_\_\_\_ sph



Nomen: \_\_\_\_\_

Datum: \_\_\_\_\_

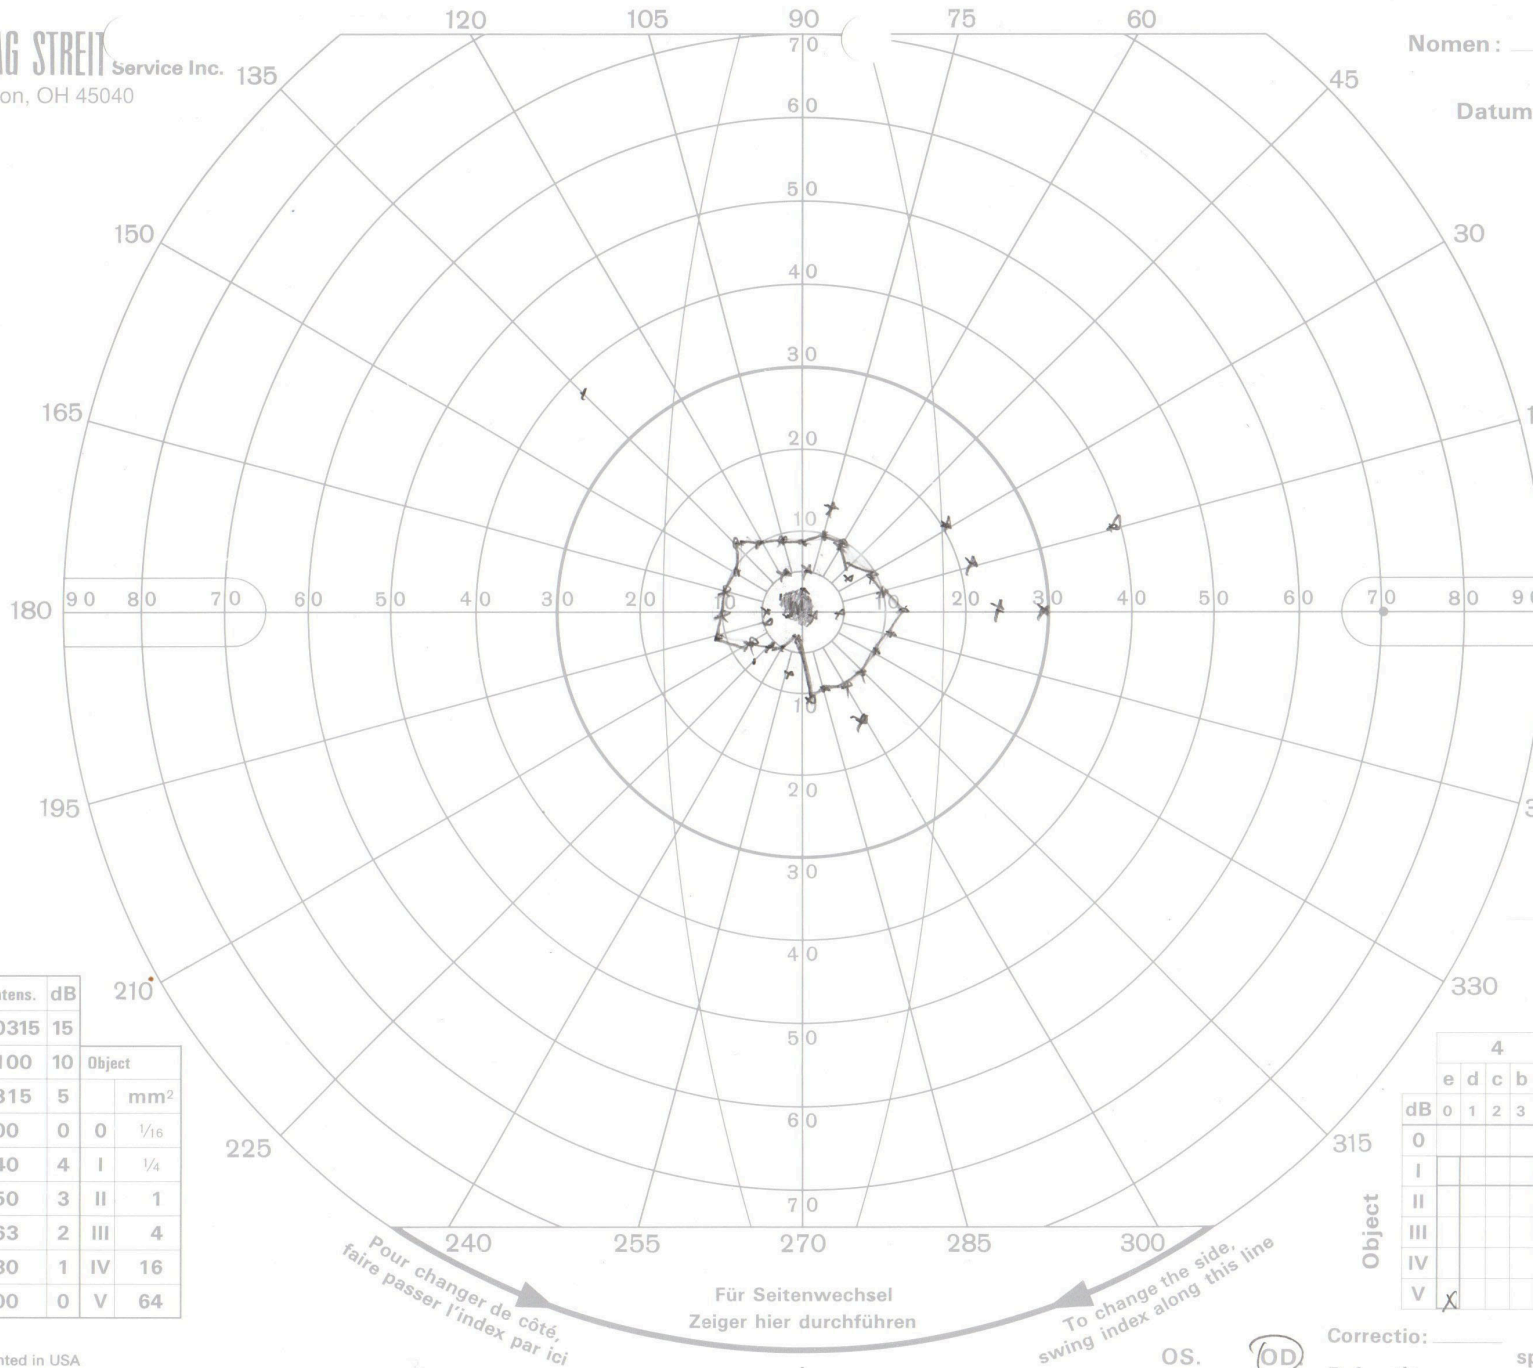

| Relat. Intens. | dB     | Object |                   |
|----------------|--------|--------|-------------------|
| 1              | 0,0315 | 15     |                   |
| 2              | 0,100  | 10     |                   |
| 3              | 0,315  | 5      |                   |
| 4              | 1,00   | 0      | 0 mm <sup>2</sup> |
| a              | 0,40   | 4      | I 1/4             |
| b              | 0,50   | 3      | II 1              |
| c              | 0,63   | 2      | III 4             |
| d              | 0,80   | 1      | IV 16             |
| e              | 1,00   | 0      | V 64              |

| dB  | Object |   |   |   |
|-----|--------|---|---|---|
|     | e      | d | c | b |
| 0   |        |   |   |   |
| I   |        |   |   |   |
| II  |        |   |   |   |
| III |        |   |   |   |
| IV  |        |   |   |   |
| V   |        |   |   |   |

Pour changer de côté,  
faire passer l'index par ici

Für Seitenwechsel  
Zeiger hier durchführen

To change the side,  
swing index along this line

OS.

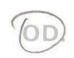

Correctio: \_\_\_\_\_  
Refractio: \_\_\_\_\_

Nomen: \_\_\_\_\_

Datum: \_\_\_\_\_

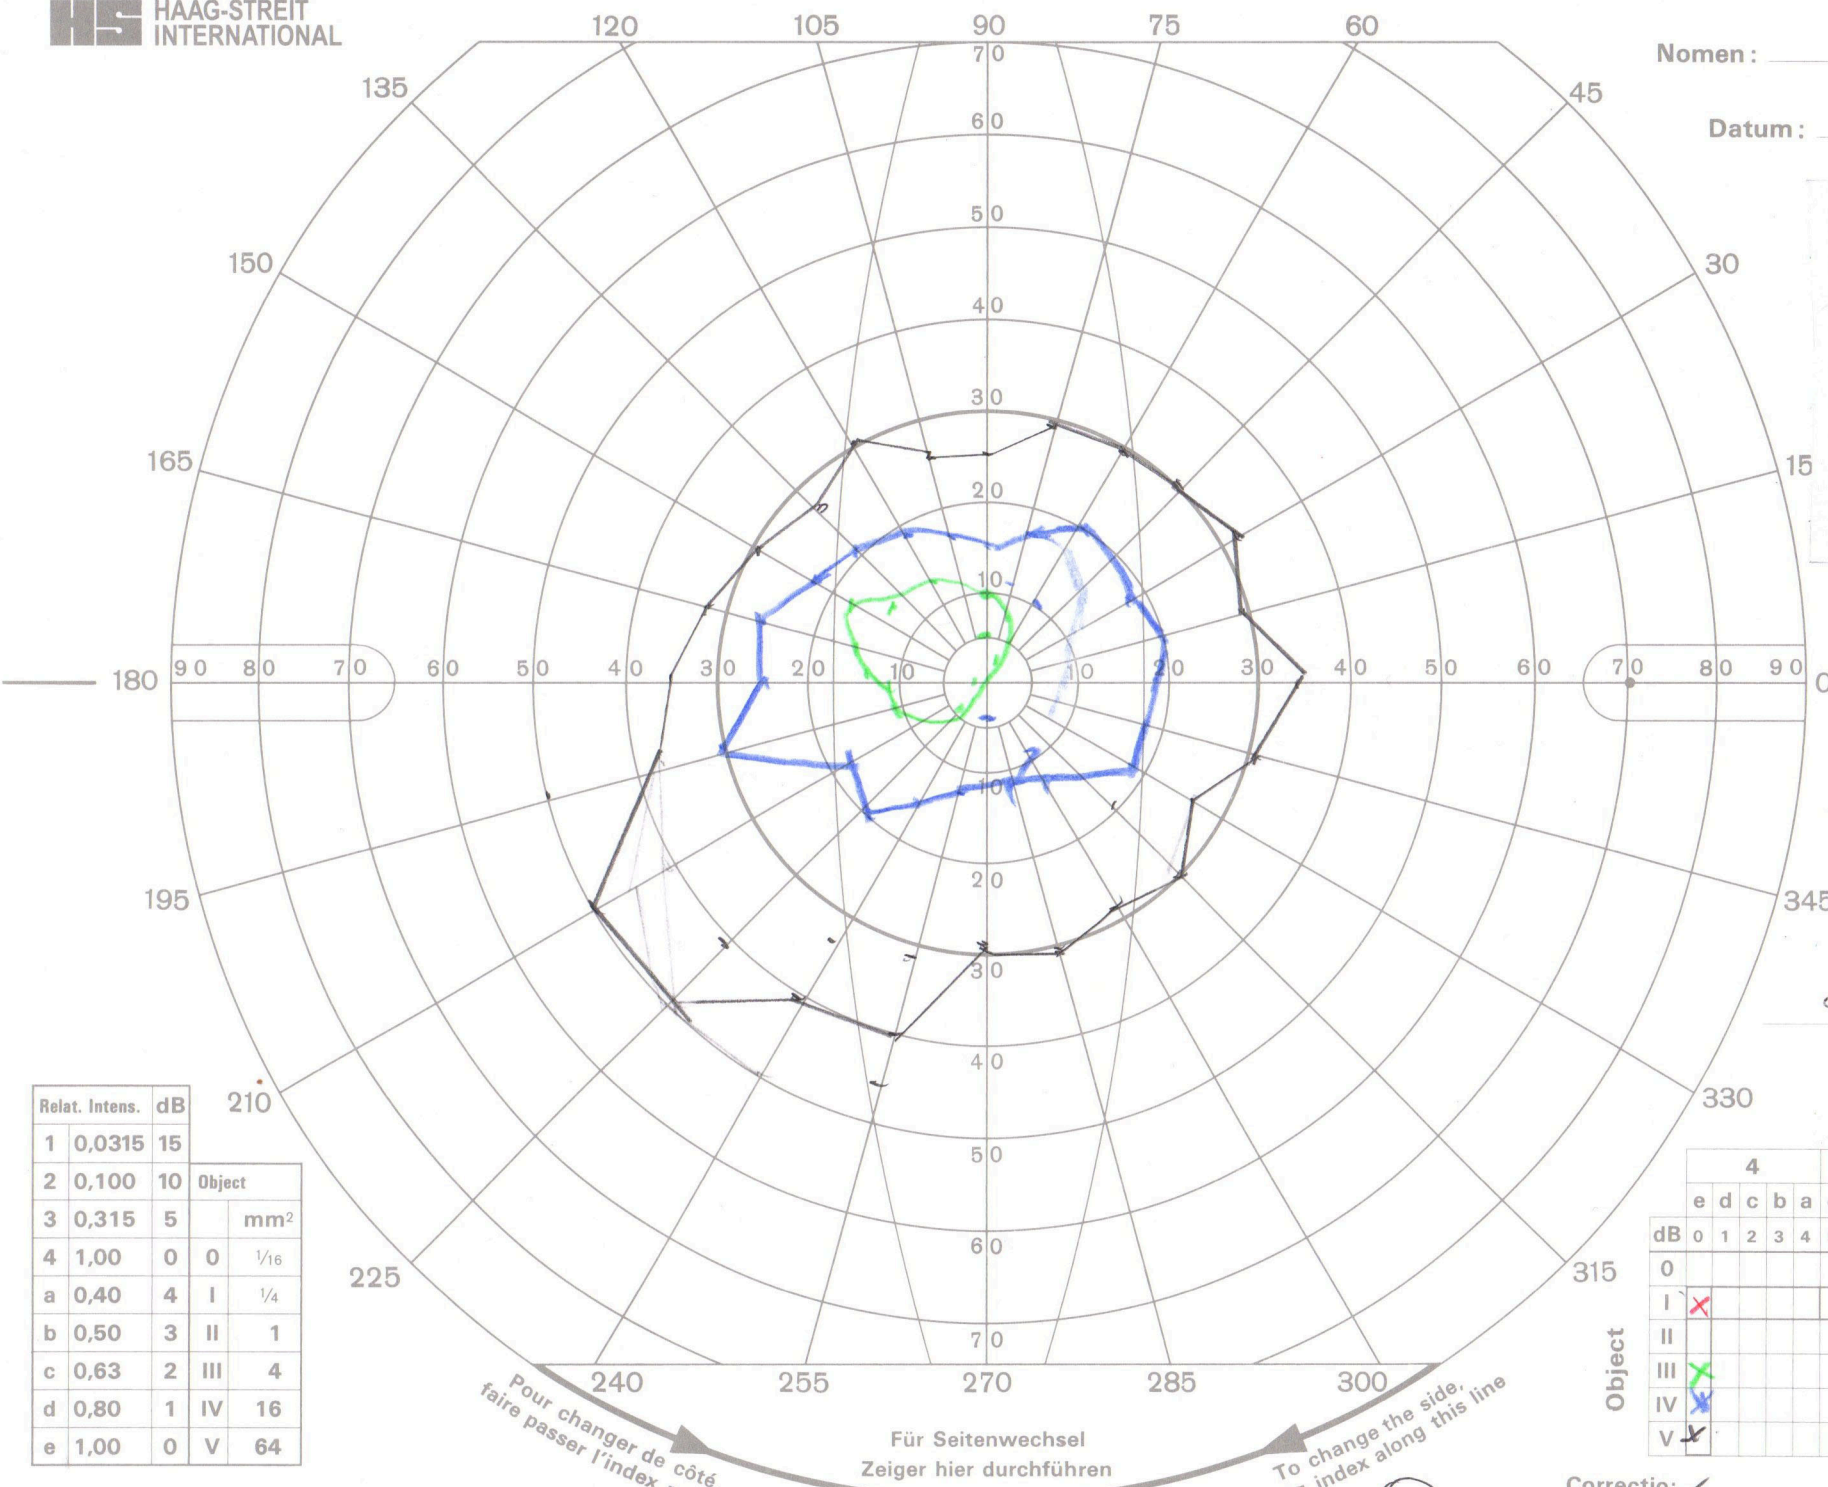

| Relat. Intens. | dB     | Object |                 |
|----------------|--------|--------|-----------------|
| 1              | 0,0315 | 15     |                 |
| 2              | 0,100  | 10     |                 |
| 3              | 0,315  | 5      | mm <sup>2</sup> |
| 4              | 1,00   | 0      | 1/16            |
| a              | 0,40   | I      | 1/4             |
| b              | 0,50   | II     | 1               |
| c              | 0,63   | III    | 4               |
| d              | 0,80   | IV     | 16              |
| e              | 1,00   | V      | 64              |

| dB  | 4 |   |   |   |   |
|-----|---|---|---|---|---|
|     | e | d | c | b | a |
| 0   |   |   |   |   |   |
| I   | X |   |   |   |   |
| II  |   |   |   |   |   |
| III |   |   |   |   |   |
| IV  |   |   |   |   |   |
| V   |   |   |   |   |   |

Pour changer de côté, faire passer l'index par ici

Für Seitenwechsel Zeiger hier durchführen

To change the side, swing index along this line

Correctio: 50 sph C  
Refractio: \_\_\_\_\_

Nomen: \_\_\_\_\_

Datum: \_\_\_\_\_

G  
S  
D  
E  
T  
F  
O  
I  
V

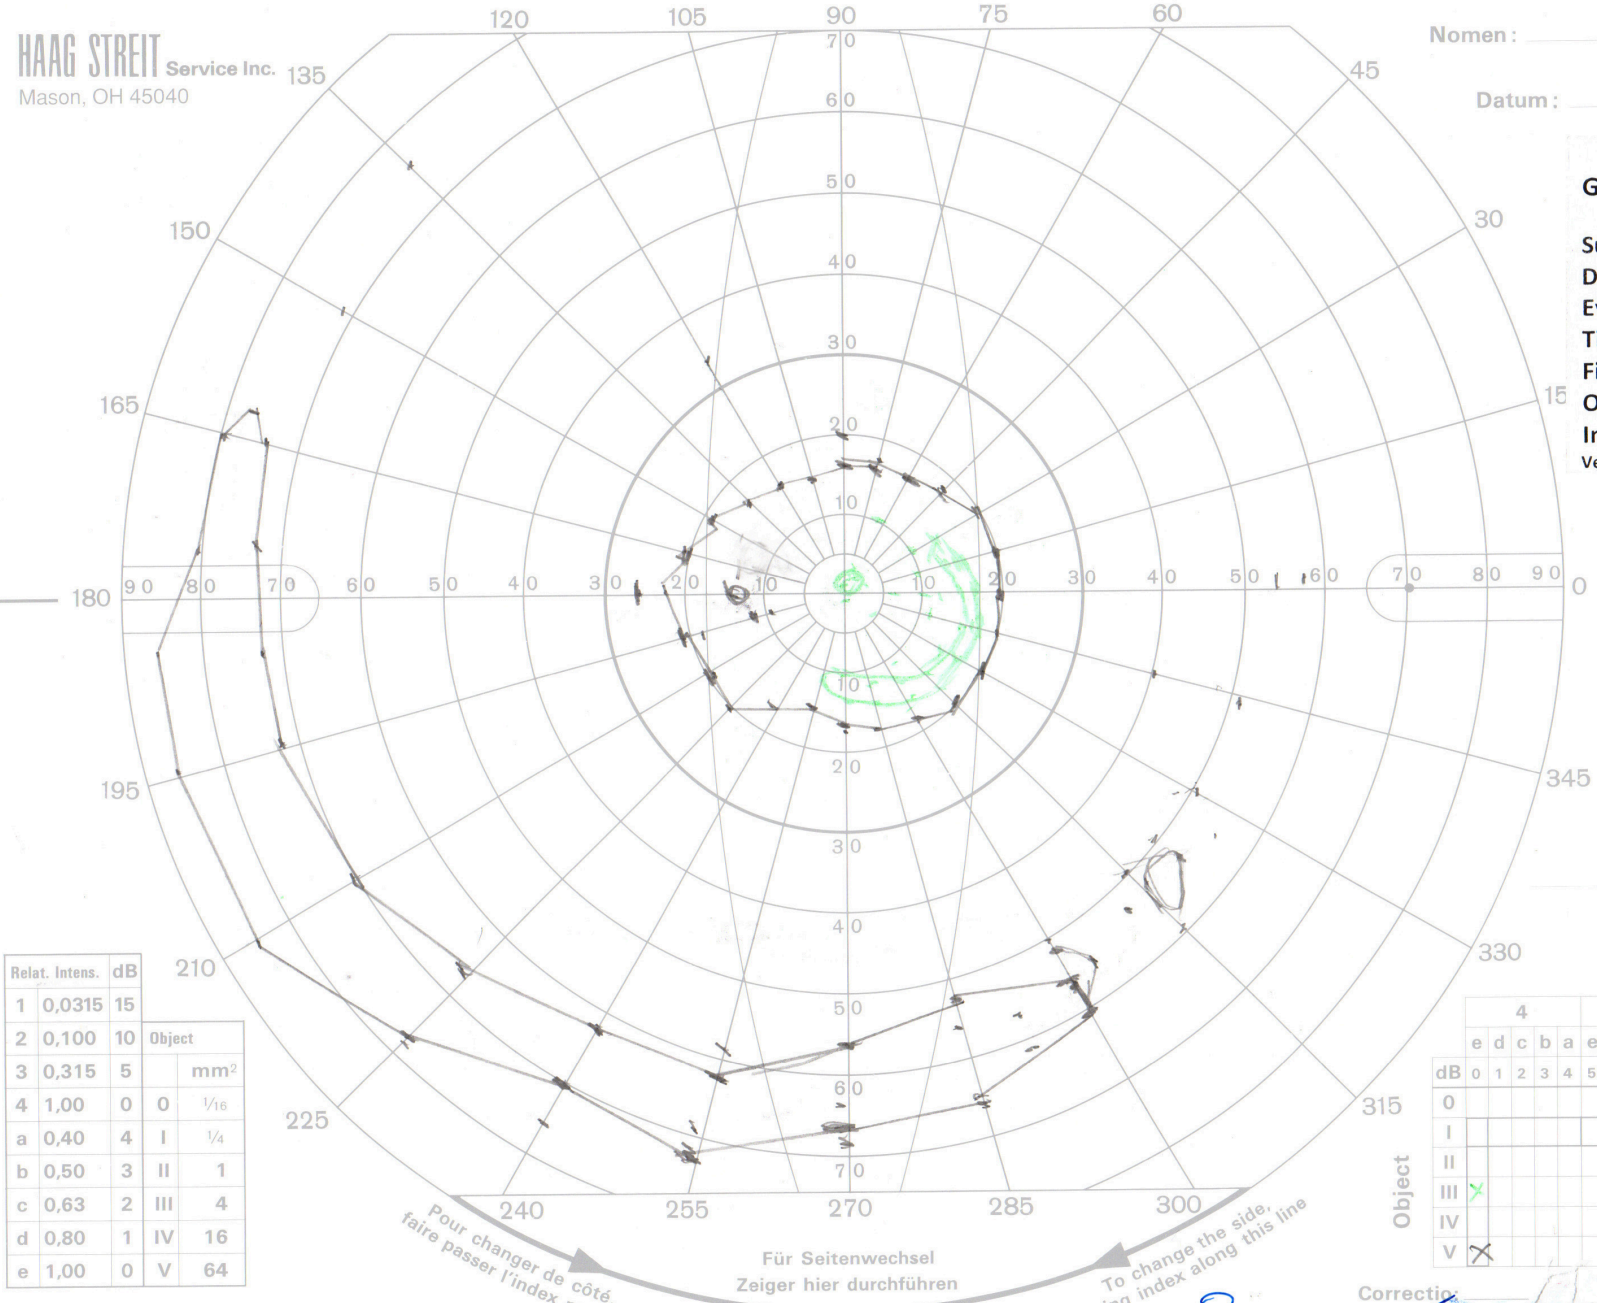

| Relat. Intens. | dB     | Object | mm <sup>2</sup> |
|----------------|--------|--------|-----------------|
| 1              | 0,0315 | 15     |                 |
| 2              | 0,100  | 10     |                 |
| 3              | 0,315  | 5      |                 |
| 4              | 1,00   | 0      | 1/16            |
| a              | 0,40   | 4      | I 1/4           |
| b              | 0,50   | 3      | II 1            |
| c              | 0,63   | 2      | III 4           |
| d              | 0,80   | 1      | IV 16           |
| e              | 1,00   | 0      | V 64            |

| Object | 4 |   |   |   |   |   |
|--------|---|---|---|---|---|---|
|        | e | d | c | b | a | e |
| dB     | 0 | 1 | 2 | 3 | 4 | 5 |
| I      |   |   |   |   |   |   |
| II     |   |   |   |   |   |   |
| III    |   |   |   |   |   |   |
| IV     |   |   |   |   |   |   |
| V      |   |   |   |   |   |   |

Pour changer de côté,  
faire passer l'index

Für Seitenwechsel  
Zeiger hier durchführen

To change the side,  
bring index along this line

Correctio
